# Supplementary material for: Profile of Polyphenol Compounds of Five Muscadine Grapes Cultivated in the United States and in Newly Adapted Locations in China
Source: MDPI journal article supplement (doi:10.3390/ijms18030631), 2017-03-14
Supplement: s1 [file s1]

**Table S1.** Total and individual polyphenol concentrations identified in skins and seeds of five muscadine grapes from Tallahassee-Florida in the 2012 season.<sup>1</sup>

| Compounds <sup>2</sup>                                    | Noble          |               | Alachua       |              | Carlos       |              | Fry           |              | Granny Val   |              |
|-----------------------------------------------------------|----------------|---------------|---------------|--------------|--------------|--------------|---------------|--------------|--------------|--------------|
|                                                           | skins          | seeds         | skins         | seeds        | skins        | seeds        | skins         | seeds        | skins        | seeds        |
| <b>Ellagic acids and precursors (mg GAE/100g DW)</b>      |                |               |               |              |              |              |               |              |              |              |
| <i>Ellagic acid derivatives</i>                           |                |               |               |              |              |              |               |              |              |              |
| Ellagic acid                                              | 112.11 ± 11.56 | 175.98 ± 4.64 | 96.93 ± 24.74 | 52.72 ± 4.91 | 91.63 ± 4.84 | 26.94 ± 2.64 | 76.18 ± 27.59 | 30.51 ± 4.16 | 51.71 ± 5.33 | 10.33 ± 0.75 |
| Mono- <i>O</i> -methyl-ellagic acid                       | 3.11 ± 2.06    | 14.82 ± 1.33  | 2.86 ± 0.23   | 7.92 ± 1.08  | 2.54 ± 0.30  | 5.47 ± 0.35  | 5.23 ± 1.76   | 4.59 ± 0.52  | 3.07 ± 1.66  | 1.26 ± 0.10  |
| Mono- <i>O</i> -methyl-ellagic acid rhamnoside            | 0.36 ± 0.16    | 0.53 ± 0.00   | 0.34 ± 0.21   | 0.53 ± 0.00  | nd           | 0.53 ± 0.00  | nd            | nd           | nd           | nd           |
| Mono- <i>O</i> -methyl-ellagic acid deoxyhexoside         | 0.23 ± 0.09    | nd            | 0.16 ± 0.05   | nd           | 0.11 ± 0.00  | nd           | 0.11 ± 0.00   | nd           | nd           | nd           |
| Ducheside A                                               | 2.41 ± 0.95    | 16.46 ± 2.88  | 3.67 ± 2.65   | 6.39 ± 0.63  | 8.88 ± 1.70  | 4.59 ± 0.44  | 5.41 ± 5.15   | 4.14 ± 0.65  | 2.99 ± 2.87  | 1.63 ± 0.06  |
| Ducheside B                                               | 5.35 ± 2.55    | 5.27 ± 0.93   | 12.31 ± 1.66  | 0.74 ± 0.04  | 6.57 ± 5.61  | 0.84 ± 0.03  | 5.74 ± 4.59   | nd           | 4.86 ± 3.93  | 0.92 ± 0.04  |
| Di- <i>O</i> -methyl-ellagic acid                         | 0.64 ± 0.21    | 8.05 ± 0.85   | 0.61 ± 0.23   | 2.57 ± 0.08  | 0.35 ± 0.02  | 1.28 ± 0.03  | 1.36 ± 0.15   | 1.39 ± 0.04  | 0.86 ± 0.18  | 0.88 ± 0.02  |
| Di- <i>O</i> -methyl-ellagic acid 4- <i>O</i> -rhamnoside | 0.18 ± 0.05    | nd            | 0.15 ± 0.04   | nd           | nd           | nd           | nd            | nd           | nd           | nd           |
| Tri- <i>O</i> -methyl-ellagic acid                        | 8.19 ± 0.16    | 7.42 ± 2.47   | 6.99 ± 2.40   | 5.77 ± 1.16  | 3.75 ± 0.09  | 6.65 ± 0.80  | 13.76 ± 0.65  | 5.59 ± 1.19  | 7.01 ± 1.50  | 3.48 ± 0.07  |
| Galloyl-tri- <i>O</i> -methyl-ellagic acid hexoside       | nd             | 0.72 ± 0.03   | 0.11 ± 0.00   | 0.76 ± 0.02  | nd           | nd           | nd            | nd           | nd           | nd           |
| Ellagic acid glucoside                                    | 3.97 ± 1.55    | 3.95 ± 0.04   | 5.53 ± 2.18   | 2.66 ± 0.03  | 4.05 ± 0.86  | 1.79 ± 0.12  | 3.00 ± 0.24   | 2.21 ± 0.22  | 2.14 ± 0.38  | 0.79 ± 0.04  |
| Ellagic acid-dihexoside                                   | nd             | 0.76 ± 0.03   | 0.26 ± 0.04   | nd           | 0.20 ± 0.04  | nd           | 0.23 ± 0.04   | nd           | 0.24 ± 0.04  | nd           |
| Ellagic acid derivative m/z 447                           | 0.36 ± 0.17    | nd            | nd            | nd           | nd           | nd           | nd            | nd           | 0.18 ± 0.02  | nd           |
| <i>Ellagitannins</i>                                      |                |               |               |              |              |              |               |              |              |              |
| Ellagitannin m/z 443                                      | 0.19 ± 0.04    | 0.83 ± 0.06   | 0.24 ± 0.06   | 0.86 ± 0.07  | 0.65 ± 0.11  | 0.85 ± 0.04  | 0.39 ± 0.05   | 0.76 ± 0.04  | 0.44 ± 0.14  | 0.69 ± 0.02  |
| Phloretin                                                 | nd             | 2.00 ± 0.19   | nd            | 3.01 ± 0.21  | nd           | 2.77 ± 0.10  | 0.11 ± 0.00   | 3.39 ± 0.30  | nd           | 1.72 ± 0.14  |
| Methyl brevifolin carboxylate                             | 5.80 ± 0.17    | 13.03 ± 0.81  | 7.46 ± 2.52   | 9.39 ± 3.23  | 5.43 ± 1.37  | 2.68 ± 0.05  | 7.53 ± 0.43   | 5.00 ± 0.34  | 3.93 ± 2.07  | 0.93 ± 0.05  |
| Valoneic acid dilactone                                   | 0.46 ± 0.04    | nd            | 0.44 ± 0.18   | nd           | 0.33 ± 0.02  | nd           | 0.50 ± 0.15   | nd           | 0.52 ± 0.17  | nd           |
| HHDP glucose                                              | 0.76 ± 0.22    | 3.61 ± 0.21   | 1.27 ± 0.65   | 0.92 ± 0.02  | 1.56 ± 0.15  | 0.65 ± 0.01  | 0.98 ± 0.68   | 0.96 ± 0.06  | 0.40 ± 0.06  | nd           |
| Ellagitannin m/z 497                                      | 0.19 ± 0.06    | nd            | 0.21 ± 0.18   | nd           | 1.46 ± 0.06  | nd           | 0.79 ± 0.57   | nd           | 0.92 ± 0.72  | nd           |
| Eriodictyol coumaroyl hexose                              | nd             | nd            | nd            | 0.77 ± 0.14  | nd           | nd           | nd            | nd           | nd           | nd           |
| Gallagic acid                                             | 0.42 ± 0.07    | nd            | 0.42 ± 0.06   | nd           | 0.36 ± 0.02  | nd           | 0.41 ± 0.12   | nd           | 0.36 ± 0.09  | nd           |
| Ellagitannin m/z 603                                      | 4.14 ± 0.35    | nd            | 3.74 ± 0.84   | 0.40 ± 0.24  | 3.06 ± 0.12  | 0.43 ± 0.17  | 2.88 ± 0.90   | 0.46 ± 0.12  | nd           | nd           |
| Galloyl-HHDP-glucose (Corilagin, Strictinin)              | 0.20 ± 0.01    | 2.70 ± 1.01   | 0.31 ± 0.08   | 1.14 ± 0.45  | 0.15 ± 0.13  | nd           | nd            | 0.95 ± 0.09  | 0.14 ± 0.03  | nd           |
| HHDP-galloyl-glucose (Isostrictinin)                      | 0.30 ± 0.17    | 1.93 ± 0.44   | 0.25 ± 0.10   | 0.88 ± 0.01  | 0.25 ± 0.07  | nd           | nd            | 0.80 ± 0.16  | 0.17 ± 0.05  | nd           |
| Ellagitannin m/z 633                                      | 0.34 ± 0.29    | nd            | 0.23 ± 0.20   | nd           | 0.20 ± 0.06  | nd           | nd            | nd           | 0.15 ± 0.03  | nd           |
| Ellagitannin m/z 643                                      | 11.88 ± 3.62   | nd            | 13.94 ± 3.65  | nd           | 0.26 ± 0.14  | nd           | nd            | nd           | nd           | nd           |
| Ellagitannin m/z 671                                      | 1.59 ± 0.12    | nd            | 2.01 ± 0.41   | nd           | 0.12 ± 0.00  | nd           | nd            | nd           | nd           | nd           |
| Ellagitannin m/z 681                                      | 1.79 ± 0.52    | nd            | 2.54 ± 1.18   | nd           | 0.13 ± 0.02  | nd           | nd            | nd           | nd           | nd           |
| Ellagitannin m/z 689                                      | 1.26 ± 0.34    | nd            | 1.68 ± 0.42   | nd           | nd           | nd           | nd            | nd           | nd           | nd           |
| Ellagitannin m/z 721                                      | 0.38 ± 0.12    | nd            | 0.38 ± 0.19   | nd           | nd           | nd           | nd            | nd           | nd           | nd           |

Supplementary Table 1 Cont.

| Compounds <sup>2</sup>                         | Noble                         |                                | Alachua                        |                                | Carlos                        |                                | Fry                           |                              | Granny Val                   |                                |
|------------------------------------------------|-------------------------------|--------------------------------|--------------------------------|--------------------------------|-------------------------------|--------------------------------|-------------------------------|------------------------------|------------------------------|--------------------------------|
|                                                | skins                         | seeds                          | skins                          | seeds                          | skins                         | seeds                          | skins                         | seeds                        | skins                        | seeds                          |
| Ellagitannin m/z 779                           | 0.45 ± 0.15                   | nd                             | nd                             | nd                             | 0.76 ± 0.12                   | nd                             | 0.36 ± 0.06                   | nd                           | nd                           | nd                             |
| Punicalin α/β isomer                           | nd                            | nd                             | nd                             | nd                             | 0.23 ± 0.09                   | nd                             | nd                            | nd                           | nd                           | nd                             |
| Pedunculagin α/β isomer<br>(Di-HHDP-glucose)   | nd                            | 0.74 ± 0.01                    | nd                             | nd                             | nd                            | nd                             | nd                            | nd                           | nd                           | nd                             |
| Tellimagrandin I<br>(Digalloyl-HHDP-glucose)   | nd                            | 4.84 ± 0.30                    | nd                             | 1.93 ± 0.36                    | nd                            | 1.08 ± 0.03                    | nd                            | 1.91 ± 0.40                  | nd                           | 0.69 ± 0.02                    |
| Ellagitannin m/z 797                           | 0.23 ± 0.02                   | nd                             | 0.26 ± 0.07                    | nd                             | 0.39 ± 0.11                   | nd                             | nd                            | nd                           | 0.36 ± 0.15                  | nd                             |
| Isomallotinic acid                             | nd                            | 0.79 ± 0.02                    | nd                             | nd                             | nd                            | nd                             | nd                            | nd                           | nd                           | nd                             |
| Ellagitannin m/z 831                           | 0.34 ± 0.12                   | nd                             | nd                             | nd                             | 1.33 ± 0.34                   | nd                             | nd                            | nd                           | nd                           | nd                             |
| Ellagitannin m/z 861                           | 0.27 ± 0.04                   | nd                             | nd                             | nd                             | 0.47 ± 0.15                   | nd                             | nd                            | nd                           | 0.28 ± 0.05                  | nd                             |
| Galloyl-bis-HHDP-glucose<br>(Casuarinin)       | nd                            | 0.96 ± 0.02                    | nd                             | nd                             | nd                            | nd                             | nd                            | nd                           | nd                           | nd                             |
| Tellimagrandin II<br>(Trigalloyl-HHDP-glucose) | nd                            | 0.99 ± 0.04                    | nd                             | 0.97 ± 0.07                    | nd                            | 0.57 ± 0.01                    | nd                            | 0.95 ± 0.07                  | nd                           | 0.54 ± 0.00                    |
| Ellagitannin m/z 957                           | 0.23 ± 0.07                   | nd                             | 0.37 ± 0.17                    | nd                             | 0.32 ± 0.03                   | nd                             | 0.57 ± 0.18                   | nd                           | 0.22 ± 0.06                  | nd                             |
| Ellagitannin m/z 967                           | nd                            | 0.80 ± 0.06                    | nd                             | nd                             | nd                            | 0.65 ± 0.07                    | nd                            | nd                           | nd                           | nd                             |
| <b>Precursors (Gallic acid derivatives)</b>    |                               |                                |                                |                                |                               |                                |                               |                              |                              |                                |
| Gallic acid                                    | 2.71 ± 0.50                   | 68.67 ± 5.51                   | 4.35 ± 1.68                    | 69.83 ± 7.22                   | 5.37 ± 0.09                   | 43.84 ± 4.90                   | 3.49 ± 0.99                   | 47.29 ± 3.10                 | 2.80 ± 0.98                  | 20.05 ± 2.94                   |
| Methyl gallate                                 | 2.13 ± 0.67                   | 41.16 ± 2.39                   | 2.48 ± 1.07                    | 36.05 ± 13.28                  | 1.70 ± 0.32                   | 51.12 ± 12.80                  | 2.02 ± 1.15                   | 53.13 ± 11.14                | 1.31 ± 0.88                  | 31.78 ± 1.39                   |
| Di- <i>O</i> -galloyl quinic acid              | 0.10 ± 0.01                   | nd                             | 0.17 ± 0.08                    | nd                             | 0.23 ± 0.13                   | nd                             | 0.17 ± 0.03                   | nd                           | 0.08 ± 0.01                  | nd                             |
| Mono- <i>O</i> -galloyl-glucose                | 0.48 ± 0.11                   | 2.80 ± 0.46                    | 0.64 ± 0.08                    | 3.59 ± 1.21                    | 0.88 ± 0.44                   | 2.12 ± 0.73                    | 0.65 ± 0.03                   | 2.94 ± 0.28                  | nd                           | 1.02 ± 0.43                    |
| Di- <i>O</i> -galloyl-glucose                  | 0.27 ± 0.06                   | 0.67 ± 0.03                    | 0.57 ± 0.17                    | 0.67 ± 0.02                    | 0.83 ± 0.05                   | 0.59 ± 0.04                    | 0.43 ± 0.12                   | 0.66 ± 0.14                  | 0.30 ± 0.09                  | 0.58 ± 0.01                    |
| Tri- <i>O</i> -galloyl-glucose                 | nd                            | 3.68 ± 0.27                    | nd                             | 3.06 ± 0.95                    | 0.11 ± 0.01                   | 1.74 ± 0.55                    | nd                            | 1.81 ± 0.46                  | nd                           | 1.06 ± 0.10                    |
| Tetra- <i>O</i> -galloyl-glucose               | nd                            | 13.93 ± 2.40                   | nd                             | 14.98 ± 0.23                   | nd                            | 7.83 ± 0.42                    | nd                            | 15.67 ± 0.84                 | nd                           | 5.30 ± 0.56                    |
| Penta- <i>O</i> -galloyl-glucose               | nd                            | 238.65 ± 16.05                 | nd                             | 282.25 ± 56.06                 | nd                            | 92.18 ± 7.05                   | nd                            | 297.39 ± 21.66               | nd                           | 69.52 ± 18.35                  |
| Gallic acid derivative m/z 569                 | nd                            | nd                             | nd                             | nd                             | 0.27 ± 0.06                   | nd                             | nd                            | nd                           | nd                           | nd                             |
| Gallotannin m/z 803                            | 0.48 ± 0.13                   | nd                             | 0.42 ± 0.29                    | nd                             | nd                            | nd                             | nd                            | nd                           | nd                           | nd                             |
| Total                                          | 174.3 ±<br>19.48 <sup>d</sup> | 636.75 ±<br>28.83 <sup>a</sup> | 174.31 ±<br>26.69 <sup>d</sup> | 510.76 ±<br>39.46 <sup>b</sup> | 144.94 ±<br>5.20 <sup>d</sup> | 257.21 ±<br>20.16 <sup>c</sup> | 132.3 ±<br>40.12 <sup>d</sup> | 482.5 ±<br>8.70 <sup>b</sup> | 85.42 ±<br>7.44 <sup>c</sup> | 153.14 ±<br>22.68 <sup>d</sup> |
| <b>Flavonols (mg RE/100g DW)</b>               |                               |                                |                                |                                |                               |                                |                               |                              |                              |                                |
| Myricetin                                      | nd                            | 0.02 ± 0.02                    | nd                             | nd                             | 0.04 ± 0.02                   | nd                             | nd                            | nd                           | nd                           | nd                             |
| Myricetin tri-methyl ether                     | 12.68 ± 3.99                  | 2.11 ± 0.84                    | 12.27 ± 2.02                   | nd                             | 15.29 ± 3.19                  | nd                             | 18.80 ± 0.50                  | nd                           | 13.84 ± 7.35                 | nd                             |
| Myricetin 3- <i>O</i> -glucuronide             | nd                            | 0.61 ± 0.03                    | nd                             | nd                             | nd                            | nd                             | nd                            | nd                           | nd                           | nd                             |
| Myricetin 3- <i>O</i> -glucoside               | 1.10 ± 0.45                   | nd                             | 1.29 ± 0.08                    | nd                             | 0.16 ± 0.02                   | nd                             | 0.12 ± 0.02                   | nd                           | nd                           | nd                             |
| Myricetin 3,4'-diglucoside                     | 0.28 ± 0.04                   | nd                             | 0.37 ± 0.11                    | nd                             | nd                            | nd                             | nd                            | nd                           | nd                           | nd                             |
| Quercetin                                      | 1.11 ± 0.44                   | 0.46 ± 0.24                    | 2.47 ± 2.42                    | 0.06 ± 0.05                    | 2.35 ± 0.49                   | nd                             | 0.44 ± 0.24                   | 0.10 ± 0.06                  | nd                           | nd                             |
| Quercetin 3-glucuronide                        | 0.35 ± 0.10                   | nd                             | 0.23 ± 0.06                    | nd                             | 0.23 ± 0.10                   | nd                             | 0.14 ± 0.01                   | nd                           | 0.14 ± 0.02                  | nd                             |
| Quercetin 3- <i>O</i> -glucoside               | 1.33 ± 0.04                   | 0.17 ± 0.01                    | 1.28 ± 0.63                    | 0.13 ± 0.02                    | 0.28 ± 0.04                   | 0.12 ± 0.01                    | nd                            | 0.12 ± 0.03                  | nd                           | 0.09 ± 0.00                    |
| Quercetin malonyl glucoside                    | 0.07 ± 0.00                   | nd                             | nd                             | nd                             | 0.08 ± 0.01                   | nd                             | nd                            | nd                           | nd                           | nd                             |

Supplementary Table 1 Cont.

| Compounds <sup>2</sup>                     | Noble                       |                           | Alachua                   |                             | Carlos                      |                             | Fry                           |                             | Granny Val                    |                            |
|--------------------------------------------|-----------------------------|---------------------------|---------------------------|-----------------------------|-----------------------------|-----------------------------|-------------------------------|-----------------------------|-------------------------------|----------------------------|
|                                            | skins                       | seeds                     | skins                     | seeds                       | skins                       | seeds                       | skins                         | seeds                       | skins                         | seeds                      |
| Rutin                                      | 0.08 ± 0.01                 | nd                        | 0.08 ± 0.00               | nd                          | nd                          | nd                          | nd                            | nd                          | nd                            | nd                         |
| Quercetin 3,4'-diglucoside                 | 1.56 ± 0.21                 | nd                        | 2.01 ± 0.35               | nd                          | nd                          | nd                          | nd                            | nd                          | nd                            | nd                         |
| Dihydroquercetin                           | nd                          | 8.19 ± 1.59               | nd                        | 14.55 ± 5.91                | nd                          | 15.02 ± 1.08                | nd                            | 21.69 ± 3.19                | nd                            | 6.84 ± 1.54                |
| Dihydroquercetin 3- <i>O</i> -hexoside     | nd                          | nd                        | nd                        | nd                          | nd                          | nd                          | 0.24 ± 0.02                   | nd                          | nd                            | nd                         |
| Dihydroquercetin caffeoyl glucoside        | 5.15 ± 2.31                 | nd                        | 4.45 ± 3.31               | nd                          | 0.09 ± 0.00                 | nd                          | nd                            | nd                          | nd                            | nd                         |
| Kaempferol                                 | 0.18 ± 0.22                 | nd                        | 0.26 ± 0.25               | nd                          | 0.10 ± 0.05                 | nd                          | nd                            | nd                          | nd                            | nd                         |
| Kaempferol 3- <i>O</i> -glucuronide        | 0.11 ± 0.03                 | nd                        | 0.22 ± 0.18               | nd                          | 0.19 ± 0.02                 | nd                          | 0.18 ± 0.07                   | nd                          | nd                            | nd                         |
| Kaempferol 3- <i>O</i> -rhamnoside         | 0.69 ± 0.17                 | nd                        | 1.23 ± 0.37               | nd                          | 1.78 ± 0.09                 | nd                          | 2.57 ± 1.16                   | nd                          | 1.82 ± 1.09                   | nd                         |
| Kaempferol 3- <i>O</i> -glucoside          | 0.69 ± 0.51                 | 1.32 ± 0.74               | 0.59 ± 0.48               | nd                          | nd                          | nd                          | nd                            | nd                          | nd                            | nd                         |
| Amurensin                                  | nd                          | nd                        | nd                        | nd                          | 0.08 ± 0.00                 | nd                          | nd                            | nd                          | nd                            | nd                         |
| Kaempferol dihexose                        | 0.68 ± 0.24                 | nd                        | 0.69 ± 0.34               | nd                          | nd                          | nd                          | nd                            | nd                          | nd                            | nd                         |
| Kaempferol 3- <i>O</i> -rutinoside         | 0.10 ± 0.02                 | nd                        | 0.11 ± 0.04               | nd                          | nd                          | nd                          | 0.17 ± 0.06                   | nd                          | nd                            | nd                         |
| Dihydrokaempferol 3- <i>O</i> -arabinoside | 1.75 ± 0.72                 | nd                        | 1.59 ± 0.87               | nd                          | 0.09 ± 0.00                 | nd                          | 0.09 ± 0.00                   | nd                          | nd                            | nd                         |
| Dihydrokaempferol 7- <i>O</i> -glucoside   | nd                          | 1.34 ± 0.05               | nd                        | 1.53 ± 0.22                 | nd                          | 1.33 ± 0.14                 | nd                            | 1.11 ± 0.05                 | nd                            | 0.94 ± 0.11                |
| Isorhamnetin                               | nd                          | 4.48 ± 0.75               | 0.44 ± 0.43               | 3.74 ± 0.37                 | 0.28 ± 0.03                 | 3.45 ± 0.09                 | nd                            | 4.78 ± 0.34                 | nd                            | 2.31 ± 0.12                |
| Isorhamnetin 3-glucuronide                 | 0.08 ± 0.00                 | 0.18 ± 0.05               | nd                        | nd                          | 0.20 ± 0.02                 | nd                          | 0.07 ± 0.00                   | nd                          | 0.09 ± 0.02                   | nd                         |
| Isorhamnetin 3-glucoside                   | 0.94 ± 0.23                 | nd                        | 1.12 ± 0.72               | nd                          | nd                          | nd                          | nd                            | nd                          | nd                            | nd                         |
| Isorhamnetin sophorose                     | 0.76 ± 0.24                 | nd                        | 0.63 ± 0.11               | nd                          | 0.08 ± 0.01                 | nd                          | nd                            | nd                          | nd                            | nd                         |
| Laricitrin                                 | nd                          | 0.09 ± 0.00               | nd                        | nd                          | nd                          | 0.09 ± 0.01                 | 0.12 ± 0.06                   | 0.08 ± 0.01                 | 0.09 ± 0.02                   | nd                         |
| Laricitrin 3- <i>O</i> -glucoside          | 1.22 ± 0.28                 | nd                        | 1.18 ± 0.57               | nd                          | 0.10 ± 0.00                 | nd                          | 0.08 ± 0.00                   | nd                          | 0.10 ± 0.02                   | nd                         |
| Syringetin                                 | 4.49 ± 3.20                 | nd                        | 5.22 ± 2.21               | 1.25 ± 0.93                 | nd                          | 0.68 ± 0.31                 | 7.03 ± 1.06                   | nd                          | nd                            | nd                         |
| Total                                      | 35.42 ± 3.12 <sup>a,b</sup> | 18.96 ± 2.65 <sup>c</sup> | 37.74 ± 4.01 <sup>a</sup> | 21.26 ± 5.79 <sup>d,e</sup> | 21.52 ± 3.61 <sup>d,e</sup> | 20.69 ± 0.85 <sup>d,e</sup> | 30.06 ± 2.11 <sup>b,c</sup>   | 27.89 ± 3.47 <sup>c,d</sup> | 16.07 ± 8.41 <sup>e,f</sup>   | 10.17 ± 1.77 <sup>f</sup>  |
| <b>Benzoic acids (mg GAE/100g DW)</b>      |                             |                           |                           |                             |                             |                             |                               |                             |                               |                            |
| Vanillic acid                              | 0.46 ± 0.24                 | nd                        | 0.37 ± 0.04               | nd                          | nd                          | 0.55 ± 0.02                 | nd                            | 0.54 ± 0.00                 | nd                            | 0.54 ± 0.00                |
| Vanillic acid 4-glucoside                  | 5.67 ± 1.96                 | nd                        | 2.20 ± 1.26               | nd                          | nd                          | nd                          | 0.16 ± 0.02                   | 0.54 ± 0.00                 | 0.14 ± 0.02                   | 0.54 ± 0.01                |
| Syringic acid                              | 0.12 ± 0.01                 | 1.67 ± 0.10               | 0.15 ± 0.02               | 4.12 ± 0.03                 | nd                          | 2.71 ± 0.12                 | nd                            | 5.41 ± 0.29                 | nd                            | 0.60 ± 0.00                |
| Mono-hydroxybenzoic acid                   | 0.20 ± 0.04                 | 0.53 ± 0.00               | 0.21 ± 0.03               | nd                          | 0.26 ± 0.02                 | 0.53 ± 0.00                 | 0.20 ± 0.02                   | 0.53 ± 0.00                 | 0.20 ± 0.02                   | 0.53 ± 0.00                |
| Di-hydroxybenzoic acid                     | 0.46 ± 0.11                 | 0.59 ± 0.01               | 0.37 ± 0.22               | 0.55 ± 0.01                 | 0.60 ± 0.06                 | 0.57 ± 0.01                 | 0.56 ± 0.13                   | 0.54 ± 0.01                 | 0.79 ± 0.20                   | 0.55 ± 0.00                |
| Brevifolin carboxylic acid                 | 10.76 ± 4.02                | 0.66 ± 0.07               | 11.54 ± 2.83              | 0.66 ± 0.05                 | 7.92 ± 0.67                 | 0.57 ± 0.01                 | 10.00 ± 2.03                  | 0.60 ± 0.01                 | 9.98 ± 1.49                   | 0.57 ± 0.02                |
| Mucic acid digallate                       | 0.67 ± 0.20                 | nd                        | 0.53 ± 0.13               | nd                          | 1.20 ± 0.31                 | nd                          | 0.57 ± 0.05                   | nd                          | 0.48 ± 0.03                   | nd                         |
| Mucic acid lactone digallate               | 0.60 ± 0.10                 | nd                        | 0.63 ± 0.20               | nd                          | 0.99 ± 0.17                 | nd                          | 0.55 ± 0.07                   | nd                          | 0.52 ± 0.14                   | nd                         |
| Mucic acid methyl ester digallate          | 0.57 ± 0.14                 | nd                        | 0.79 ± 0.32               | nd                          | 0.75 ± 0.19                 | nd                          | 0.74 ± 0.12                   | nd                          | 0.75 ± 0.22                   | nd                         |
| Citric acid                                | nd                          | 0.75 ± 0.09               | 0.25 ± 0.13               | 1.42 ± 0.98                 | 0.33 ± 0.05                 | nd                          | 0.37 ± 0.10                   | nd                          | 3.28 ± 5.30                   | 0.63 ± 0.02                |
| Malic acid                                 | nd                          | nd                        | nd                        | nd                          | 0.24 ± 0.11                 | nd                          | 0.16 ± 0.04                   | nd                          | 0.28 ± 0.13                   | nd                         |
| 1- <i>O</i> -protocatechuoyl-glucose       | nd                          | nd                        | nd                        | nd                          | nd                          | nd                          | nd                            | 0.98 ± 0.08                 | nd                            | 0.98 ± 0.03                |
| Total                                      | 19.49 ± 2.43 <sup>a</sup>   | 4.20 ± 0.25 <sup>f</sup>  | 17.04 ± 2.40 <sup>b</sup> | 6.75 ± 1.01 <sup>e,f</sup>  | 12.28 ± 0.91 <sup>c,d</sup> | 4.93 ± 0.14 <sup>e,f</sup>  | 13.31 ± 2.38 <sup>b,c,d</sup> | 9.14 ± 0.37 <sup>d,e</sup>  | 16.41 ± 6.13 <sup>a,b,c</sup> | 4.93 ± 0.03 <sup>e,f</sup> |

Supplementary Table 1 *Cont.*

| Compounds <sup>2</sup>                 | Noble                    |                            | Alachua                  |                             | Carlos                   |                            | Fry                      |                             | Granny Val               |                             |
|----------------------------------------|--------------------------|----------------------------|--------------------------|-----------------------------|--------------------------|----------------------------|--------------------------|-----------------------------|--------------------------|-----------------------------|
|                                        | skins                    | seeds                      | skins                    | seeds                       | skins                    | seeds                      | skins                    | seeds                       | skins                    | seeds                       |
| <b>Flavan-3-ols (mg EE/100g DW)</b>    |                          |                            |                          |                             |                          |                            |                          |                             |                          |                             |
| (Epi)catechin                          | nd                       | 47.39 ± 10.27              | 0.02 ± 0.00              | 120.14 ± 25.58              | 0.02 ± 0.00              | 116.49 ± 6.81              | 0.02 ± 0.00              | 149.5 ± 32.53               | 0.02 ± 0.00              | 135.26 ± 15.14              |
| (Epi)catechin gallate                  | nd                       | 12.70 ± 2.50               | nd                       | 32.00 ± 3.59                | nd                       | 27.53 ± 3.93               | nd                       | 44.8 ± 1.16                 | nd                       | 35.53 ± 1.13                |
| (Epi)catechin hexoside                 | nd                       | 3.28 ± 0.53                | nd                       | 5.20 ± 3.92                 | nd                       | 4.01 ± 2.33                | nd                       | 5.49 ± 1.86                 | nd                       | 1.90 ± 0.67                 |
| (Epi)gallocatechin                     | nd                       | nd                         | nd                       | 1.18 ± 0.40                 | nd                       | nd                         | nd                       | 0.96 ± 0.15                 | nd                       | 1.02 ± 0.07                 |
| (Epi)gallocatechin gallate             | nd                       | 2.32 ± 0.16                | nd                       | 2.48 ± 0.87                 | nd                       | 2.24 ± 0.73                | nd                       | 2.08 ± 0.55                 | nd                       | 1.67 ± 0.21                 |
| Methyl epigallocatechin -3-gallate     | nd                       | 21.46 ± 3.47               | nd                       | 21.52 ± 4.54                | 0.03 ± 0.01              | 25.04 ± 3.36               | nd                       | 22.25 ± 2.44                | nd                       | 19.16 ± 2.28                |
| Procyanidin A                          | nd                       | 0.12 ± 0.10                | nd                       | 0.19 ± 0.16                 | nd                       | 0.44 ± 0.20                | nd                       | 0.75 ± 0.10                 | nd                       | 1.27 ± 0.20                 |
| Procyanidin B                          | nd                       | 2.45 ± 1.59                | nd                       | 12.10 ± 4.12                | nd                       | 6.89 ± 0.35                | nd                       | 16.78 ± 6.68                | nd                       | 13.33 ± 0.51                |
| Procyanidin trimer                     | nd                       | nd                         | nd                       | 0.27 ± 0.07                 | nd                       | 0.21 ± 0.11                | nd                       | 0.41 ± 0.14                 | nd                       | 0.42 ± 0.10                 |
| Propelargonidin dimer                  | nd                       | nd                         | nd                       | 1.73 ± 0.44                 | nd                       | 2.71 ± 1.24                | nd                       | 2.71 ± 1.45                 | nd                       | 1.61 ± 0.15                 |
| Propelargonidin trimer                 | nd                       | nd                         | nd                       | 0.79 ± 0.09                 | nd                       | 0.98 ± 0.18                | nd                       | 1.22 ± 0.18                 | nd                       | 0.85 ± 0.09                 |
| Total                                  | nd                       | 89.72 ± 11.54 <sup>c</sup> | 0.02 ± 0.00 <sup>d</sup> | 197.61 ± 31.34 <sup>b</sup> | 0.05 ± 0.01 <sup>d</sup> | 186.56 ± 6.13 <sup>b</sup> | 0.02 ± 0.00 <sup>d</sup> | 246.94 ± 38.98 <sup>a</sup> | 0.02 ± 0.00 <sup>d</sup> | 212.01 ± 14.05 <sup>b</sup> |
| <b>Stilbens (mg REE/100g DW)</b>       |                          |                            |                          |                             |                          |                            |                          |                             |                          |                             |
| Resveratrol                            | 0.06 ± 0.00              | nd                         | nd                       | nd                          | nd                       | nd                         | nd                       | nd                          | 0.06 ± 0.00              | nd                          |
| Total                                  | 0.06 ± 0.00 <sup>a</sup> | nd                         | nd                       | nd                          | nd                       | nd                         | nd                       | nd                          | 0.06 ± 0.00 <sup>a</sup> | nd                          |
| <b>Cinnamic acids (mg CAE/100g DW)</b> |                          |                            |                          |                             |                          |                            |                          |                             |                          |                             |
| Ferulic acid                           | nd                       | nd                         | nd                       | nd                          | nd                       | nd                         | 0.11 ± 0.02              | nd                          | nd                       | nd                          |
| Di-coumaroyl hexose                    | nd                       | nd                         | nd                       | nd                          | nd                       | nd                         | nd                       | nd                          | 0.19 ± 0.02              | nd                          |
| Total                                  | nd                       | nd                         | nd                       | nd                          | nd                       | nd                         | 0.11 ± 0.02 <sup>b</sup> | nd                          | 0.19 ± 0.02 <sup>a</sup> | nd                          |

<sup>1</sup> Values are expressed as means of triplicate determinations ± standard deviation (S.D.). nd, not detected. For the total concentrations, different small letters within row indicate significant differences (Duncan's test,  $p = 0.05$ ).

<sup>2</sup> Ellagic acid, (-)-epicatechin, gallic acid, kaempferol, myricetin, penta-*O*-galloyl-glucose, quercetin, resveratrol, and rutin are quantified by their standard, respectively, and expressed as mg/100g DW. GAE: gallic acid equivalent; RE: rutin equivalent; EE: (-)-epicatechin equivalent; REE: resveratrol equivalent; CAE: caffeic acid equivalent.
