# Supplementary material for: Profile of Polyphenol Compounds of Five Muscadine Grapes Cultivated in the United States and in Newly Adapted Locations in China
Source: MDPI journal article supplement (doi:10.3390/ijms18030631), 2017-03-14
Supplement: s1 [file s1]

**Table S3.** Total and individual polyphenol concentrations identified in skins and seeds of three muscadine grapes from Pu'er-Yunnan in the 2012 season.<sup>1</sup>

| Compounds <sup>2</sup>                                    | Noble                       |                             | Carlos                     |                             | Granny Val                  |                            |
|-----------------------------------------------------------|-----------------------------|-----------------------------|----------------------------|-----------------------------|-----------------------------|----------------------------|
|                                                           | skins                       | seeds                       | skins                      | seeds                       | skins                       | seeds                      |
| <b>Ellagic acids and precursors (mg GAE/100g DW)</b>      |                             |                             |                            |                             |                             |                            |
| <i>Ellagic acid derivatives</i>                           |                             |                             |                            |                             |                             |                            |
| Ellagic acid                                              | 109.68 ± 16.73              | 110.36 ± 8.55               | 100.78 ± 1.47              | 55.00 ± 4.11                | 110.42 ± 14.3               | 45.24 ± 9.85               |
| Mono- <i>O</i> -methyl-ellagic acid                       | 1.57 ± 0.41                 | 6.44 ± 0.81                 | 2.48 ± 0.06                | 6.37 ± 1.09                 | 6.09 ± 2.39                 | 5.01 ± 0.37                |
| Mono- <i>O</i> -methyl-ellagic acid rhamnoside            | 0.27 ± 0.12                 | 0.53 ± 0.00                 | nd                         | nd                          | nd                          | 0.53 ± 0.00                |
| Mono- <i>O</i> -methyl-ellagic acid deoxyhexoside         | 0.12 ± 0.01                 | nd                          | nd                         | nd                          | 0.11 ± 0.00                 | nd                         |
| Ducheside A                                               | 6.90 ± 1.58                 | 8.68 ± 2.54                 | 10.05 ± 1.68               | 6.38 ± 1.93                 | 14.83 ± 1.74                | 12.22 ± 1.44               |
| Ducheside B                                               | 13.95 ± 1.45                | 2.68 ± 0.69                 | 7.84 ± 1.40                | 0.91 ± 0.11                 | 11.03 ± 4.58                | 1.22 ± 0.29                |
| Di- <i>O</i> -methyl-ellagic acid                         | 0.34 ± 0.04                 | 4.43 ± 0.29                 | 0.29 ± 0.02                | 1.62 ± 0.17                 | 0.90 ± 0.25                 | 2.17 ± 0.18                |
| Di- <i>O</i> -methyl-ellagic acid 4- <i>O</i> -rhamnoside | nd                          | nd                          | nd                         | nd                          | 0.11 ± 0.00                 | nd                         |
| Tri- <i>O</i> -methyl-ellagic acid                        | 4.40 ± 0.92                 | 10.38 ± 4.91                | 2.65 ± 0.25                | 9.72 ± 1.88                 | 8.46 ± 2.05                 | 5.51 ± 0.61                |
| Ellagic acid glucoside                                    | 6.81 ± 1.69                 | 2.33 ± 0.11                 | 7.23 ± 0.63                | 2.46 ± 0.53                 | 11.39 ± 3.81                | 3.83 ± 0.43                |
| Ellagic acid coumaroyl hexoside                           | 0.35 ± 0.08                 | nd                          | 0.15 ± 0.01                | nd                          | 0.25 ± 0.08                 | nd                         |
| Ellagic acid dihexoside                                   | 0.22 ± 0.02                 | nd                          | nd                         | nd                          | 0.21 ± 0.07                 | nd                         |
| Ellagic acid derivative m/z 447                           | 1.26 ± 0.33                 | nd                          | 0.65 ± 0.04                | nd                          | nd                          | nd                         |
| <i>Ellagitannins</i>                                      |                             |                             |                            |                             |                             |                            |
| Ellagitannin m/z 443                                      | 0.26 ± 0.03                 | 0.71 ± 0.06                 | 0.70 ± 0.07                | 1.08 ± 0.21                 | 0.62 ± 0.22                 | 1.03 ± 0.09                |
| Phloretin                                                 | nd                          | 1.56 ± 0.05                 | nd                         | 2.08 ± 0.23                 | nd                          | 1.10 ± 0.10                |
| Methyl brevifolin carboxylate                             | 6.81 ± 1.07                 | 11.08 ± 1.31                | 5.17 ± 1.27                | 4.13 ± 1.01                 | 5.22 ± 3.50                 | 7.70 ± 0.46                |
| Valoneic acid dilactone                                   | 0.32 ± 0.10                 | nd                          | 0.35 ± 0.03                | nd                          | 0.49 ± 0.13                 | nd                         |
| HHDP glucose                                              | 1.12 ± 0.19                 | 2.96 ± 0.34                 | 1.21 ± 0.13                | 0.79 ± 0.06                 | 1.62 ± 0.39                 | 1.20 ± 0.07                |
| Ellagitannin m/z 497                                      | 0.26 ± 0.19                 | nd                          | 1.75 ± 0.14                | nd                          | 1.33 ± 0.45                 | nd                         |
| Eriodictyol coumaroyl hexose                              | nd                          | nd                          | nd                         | 0.63 ± 0.07                 | nd                          | 1.28 ± 0.14                |
| Gallagic acid                                             | 0.43 ± 0.01                 | nd                          | 0.36 ± 0.02                | nd                          | 0.52 ± 0.15                 | nd                         |
| Ellagitannin m/z 603                                      | nd                          | nd                          | nd                         | nd                          | 5.08 ± 1.29                 | nd                         |
| Galloyl-HHDP-glucose (Corilagin, Strictinin)              | 0.21 ± 0.04                 | 2.10 ± 0.54                 | 0.19 ± 0.07                | 0.68 ± 0.08                 | 0.32 ± 0.18                 | 0.85 ± 0.02                |
| HHDP-galloyl-glucose (Isostrictinin)                      | 0.24 ± 0.03                 | 1.41 ± 0.38                 | 0.23 ± 0.01                | 0.61 ± 0.08                 | 0.28 ± 0.17                 | 0.73 ± 0.14                |
| Ellagitannin m/z 633                                      | 0.26 ± 0.21                 | nd                          | 0.14 ± 0.04                | nd                          | 0.23 ± 0.14                 | nd                         |
| Ellagitannin m/z 643                                      | 21.58 ± 1.04                | nd                          | 0.22 ± 0.01                | nd                          | 0.35 ± 0.18                 | nd                         |
| Ellagitannin m/z 671                                      | 2.53 ± 0.24                 | nd                          | 0.12 ± 0.01                | nd                          | nd                          | nd                         |
| Ellagitannin m/z 681                                      | 2.60 ± 0.87                 | nd                          | nd                         | nd                          | nd                          | nd                         |
| Ellagitannin m/z 689                                      | 2.21 ± 0.63                 | nd                          | nd                         | nd                          | nd                          | nd                         |
| Ellagitannin m/z 721                                      | 0.20 ± 0.04                 | nd                          | nd                         | nd                          | nd                          | nd                         |
| Ellagitannin m/z 779                                      | nd                          | nd                          | 1.26 ± 0.40                | nd                          | 1.81 ± 0.84                 | nd                         |
| Punicalin α/β isomer                                      | nd                          | nd                          | nd                         | nd                          | 0.32 ± 0.11                 | nd                         |
| Pedunculagin α/β isomer (Di-HHDP-glucose)                 | nd                          | nd                          | nd                         | 0.53 ± 0.01                 | nd                          | 0.56 ± 0.02                |
| Tellimagrandin I (Digalloyl-HHDP-glucose)                 | 0.17 ± 0.01                 | 3.38 ± 0.58                 | nd                         | 1.57 ± 0.27                 | 0.22 ± 0.09                 | 1.70 ± 0.17                |
| Ellagitannin m/z 797                                      | 0.42 ± 0.02                 | nd                          | 0.53 ± 0.01                | nd                          | 0.74 ± 0.25                 | nd                         |
| Isomallotinic acid                                        | 0.12 ± 0.01                 | 0.8 ± 0.08                  | nd                         | 1.04 ± 0.15                 | 0.17 ± 0.05                 | 0.9 ± 0.03                 |
| Ellagitannin m/z 831                                      | 1.58 ± 0.28                 | nd                          | nd                         | nd                          | 3.36 ± 2.13                 | nd                         |
| Ellagitannin m/z 861                                      | 0.49 ± 0.08                 | nd                          | 0.54 ± 0.10                | nd                          | 0.65 ± 0.11                 | nd                         |
| Galloyl-bis-HHDP-glucose (Casuarinin)                     | nd                          | 0.83 ± 0.05                 | nd                         | 0.71 ± 0.05                 | 0.10 ± 0.00                 | 0.76 ± 0.04                |
| Tellimagrandin II (Trigalloyl-HHDP-glucose)               | nd                          | 1.16 ± 0.09                 | nd                         | 0.64 ± 0.03                 | nd                          | 0.71 ± 0.06                |
| Chebulagic acid                                           | nd                          | nd                          | nd                         | 0.76 ± 0.14                 | nd                          | 0.75 ± 0.05                |
| Ellagitannin m/z 957                                      | 0.27 ± 0.00                 | nd                          | 0.29 ± 0.01                | nd                          | 0.23 ± 0.11                 | nd                         |
| Ellagitannin m/z 967                                      | nd                          | 0.67 ± 0.05                 | n                          | 0.88 ± 0.12                 | nd                          | 0.79 ± 0.02                |
| Total                                                     | 196.85 ± 17.01 <sup>b</sup> | 380.61 ± 28.78 <sup>a</sup> | 155.07 ± 3.92 <sup>c</sup> | 381.49 ± 20.34 <sup>a</sup> | 201.41 ± 26.46 <sup>b</sup> | 224.19 ± 7.81 <sup>b</sup> |
| <i>Precursors (Gallic acid derivatives)</i>               |                             |                             |                            |                             |                             |                            |
| Gallic acid                                               | 3.76 ± 0.34                 | 48.19 ± 5.81                | 4.24 ± 0.22                | 52.83 ± 6.24                | 5.38 ± 3.31                 | nd                         |
| Methyl gallate                                            | 2.90 ± 0.78                 | 65.67 ± 8.34                | 3.07 ± 0.95                | 56.19 ± 13.3                | 4.92 ± 3.78                 | 6.86 ± 2.60                |
| Di- <i>O</i> -galloyl-quinic acid                         | 0.22 ± 0.07                 | nd                          | 0.36 ± 0.13                | nd                          | 1.16 ± 0.98                 | nd                         |
| Mono- <i>O</i> -galloyl-glucose                           | 0.64 ± 0.15                 | 3.51 ± 2.23                 | 0.56 ± 0.10                | 3.41 ± 2.00                 | 0.72 ± 0.21                 | 4.97 ± 3.20                |
| Di- <i>O</i> -galloyl-glucose                             | 0.66 ± 0.14                 | 0.64 ± 0.06                 | 1.22 ± 0.23                | 0.91 ± 0.56                 | 1.47 ± 0.50                 | 0.62 ± 0.00                |
| Tri- <i>O</i> -galloyl-glucose                            | nd                          | 2.03 ± 0.62                 | 0.11 ± 0.00                | 2.04 ± 0.54                 | 0.11 ± 0.01                 | 2.95 ± 0.63                |

Supplementary Table 3 Cont.

| Compounds <sup>2</sup>                     | Noble                     |                           | Carlos                    |                           | Granny Val                 |                           |
|--------------------------------------------|---------------------------|---------------------------|---------------------------|---------------------------|----------------------------|---------------------------|
|                                            | skins                     | seeds                     | skins                     | seeds                     | skins                      | seeds                     |
| Tetra- <i>O</i> -galloyl-glucose           | nd                        | 8.01 ± 1.41               | nd                        | 12.07 ± 3.26              | nd                         | 7.63 ± 0.52               |
| Penta- <i>O</i> -galloyl-glucose           | nd                        | 80.08 ± 11.42             | nd                        | 155.46 ± 8.06             | nd                         | 105.34 ± 7.37             |
| Gallic acid derivative m/z 569             | 0.16 ± 0.00               | nd                        | 0.33 ± 0.05               | nd                        | 0.21 ± 0.08                | nd                        |
| Gallotannin m/z 803                        | 0.57 ± 0.07               | nd                        | nd                        | nd                        | nd                         | nd                        |
| <b>Flavonols (mg RE/100g DW)</b>           |                           |                           |                           |                           |                            |                           |
| Myricetin                                  | 7.81 ± 1.68               | nd                        | nd                        | nd                        | nd                         | nd                        |
| Myricetin tri-methyl ether                 | nd                        | nd                        | 16.61 ± 2.76              | nd                        | 14.35 ± 2.89               | 0.44 ± 0.12               |
| Myricetin 3- <i>O</i> -glucuronide         | nd                        | nd                        | 0.23 ± 0.02               | nd                        | nd                         | nd                        |
| Myricetin 3- <i>O</i> -glucoside           | 2.54 ± 0.07               | nd                        | 0.13 ± 0.01               | nd                        | 0.16 ± 0.04                | nd                        |
| Myricetin 3,4'-diglucoside                 | 0.79 ± 0.12               | nd                        | nd                        | nd                        | nd                         | nd                        |
| Quercetin                                  | 3.50 ± 0.58               | nd                        | 1.47 ± 0.69               | nd                        | 0.47 ± 0.27                | nd                        |
| Quercetin 3-glucuronide                    | nd                        | nd                        | 0.17 ± 0.02               | nd                        | 0.27 ± 0.09                | nd                        |
| Quercetin 3- <i>O</i> -glucoside           | 1.15 ± 0.33               | nd                        | nd                        | nd                        | nd                         | 0.13 ± 0.00               |
| Quercetin malonyl glucoside                | 0.09 ± 0.01               | nd                        | nd                        | nd                        | nd                         | 0.08 ± 0.00               |
| Rutin                                      | 0.08 ± 0.00               | nd                        | nd                        | nd                        | nd                         | nd                        |
| Quercetin 3,4'-diglucoside                 | 2.30 ± 0.34               | nd                        | nd                        | nd                        | nd                         | nd                        |
| Dihydroquercetin                           | nd                        | 5.79 ± 1.32               | nd                        | 9.64 ± 1.76               | nd                         | 2.06 ± 1.03               |
| Dihydroquercetin 3- <i>O</i> -hexoside     | 0.46 ± 0.15               | nd                        | nd                        | nd                        | 0.95 ± 0.46                | nd                        |
| Dihydroquercetin caffeoyl glucoside        | 5.00 ± 0.26               | nd                        | nd                        | nd                        | 0.13 ± 0.05                | nd                        |
| Kaempferol                                 | 0.65 ± 0.22               | nd                        | nd                        | nd                        | nd                         | nd                        |
| Kaempferol 3- <i>O</i> -glucuronide        | 0.15 ± 0.01               | nd                        | nd                        | nd                        | 0.23 ± 0.08                | nd                        |
| Kaempferol 3- <i>O</i> -rhamnoside         | 1.17 ± 0.17               | nd                        | 1.89 ± 0.38               | nd                        | 2.43 ± 1.57                | nd                        |
| Kaempferol 3- <i>O</i> -glucoside          | nd                        | 0.53 ± 0.44               | nd                        | nd                        | nd                         | 2.43 ± 1.06               |
| Kaempferol dihexose                        | 0.69 ± 0.05               | nd                        | nd                        | nd                        | nd                         | nd                        |
| Dihydrokaempferol 3- <i>O</i> -arabinoside | 0.50 ± 0.11               | nd                        | 0.08 ± 0.00               | 0.10 ± 0.00               | 0.10 ± 0.02                | 0.09 ± 0.01               |
| Dihydrokaempferol 7- <i>O</i> -glucoside   | nd                        | 1.29 ± 0.16               | nd                        | 2.03 ± 0.41               | nd                         | 4.86 ± 0.68               |
| Isorhamnetin                               | 0.40 ± 0.06               | 2.88 ± 0.40               | nd                        | 2.62 ± 0.44               | 0.14 ± 0.05                | 1.65 ± 0.99               |
| Isorhamnetin 3-glucuronide                 | 0.09 ± 0.01               | nd                        | 0.22 ± 0.01               | 0.29 ± 0.09               | 0.24 ± 0.14                | nd                        |
| Isorhamnetin 3-glucoside                   | 0.83 ± 0.35               | nd                        | nd                        | nd                        | nd                         | 0.29 ± 0.13               |
| Isorhamnetin sophorose                     | 0.92 ± 0.07               | nd                        | 0.08 ± 0.00               | nd                        | 0.09 ± 0.01                | nd                        |
| Laricitrin                                 | 0.17 ± 0.02               | nd                        | 0.09 ± 0.01               | nd                        | nd                         | nd                        |
| Laricitrin 3- <i>O</i> -glucoside          | 2.21 ± 0.29               | nd                        | nd                        | nd                        | nd                         | 0.09 ± 0.00               |
| Syringetin                                 | 7.39 ± 1.01               | nd                        | 12.13 ± 5.32              | nd                        | 16.13 ± 4.35               | nd                        |
| Total                                      | 38.89 ± 1.73 <sup>a</sup> | 10.48 ± 1.20 <sup>c</sup> | 33.10 ± 3.74 <sup>b</sup> | 14.67 ± 2.62 <sup>c</sup> | 35.69 ± 5.50 <sup>ab</sup> | 12.13 ± 0.46 <sup>c</sup> |
| <b>Benzoic acids (mg GAE/100g DW)</b>      |                           |                           |                           |                           |                            |                           |
| Vanillic acid                              | 0.42 ± 0.10               | nd                        | nd                        | nd                        | 0.11 ± 0.00                | nd                        |
| Vanillic acid 4-glucoside                  | 3.93 ± 1.96               | nd                        | 0.15 ± 0.02               | nd                        | nd                         | 0.57 ± 0.02               |
| Syringic acid                              | 0.22 ± 0.01               | 4.82 ± 0.43               | nd                        | 2.70 ± 0.41               | 2.18 ± 0.91                | 2.50 ± 0.20               |
| Mono-hydroxybenzoic acid                   | 0.27 ± 0.03               | 0.53 ± 0.00               | 0.20 ± 0.01               | 0.53 ± 0.00               | 0.21 ± 0.04                | 0.53 ± 0.00               |
| Di-hydroxybenzoic acid                     | 0.49 ± 0.36               | 0.58 ± 0.03               | 0.42 ± 0.03               | 0.70 ± 0.09               | 0.44 ± 0.17                | 0.60 ± 0.01               |
| Di-hydroxybenzate ethyl ester              | nd                        | nd                        | nd                        | nd                        | 0.35 ± 0.22                | nd                        |
| Brevifolin carboxylic acid                 | 10.43 ± 3.71              | 0.56 ± 0.02               | 3.54 ± 0.79               | 0.57 ± 0.02               | 5.02 ± 1.88                | 0.61 ± 0.06               |
| Mucic acid digallate                       | 0.61 ± 0.28               | nd                        | 0.83 ± 0.16               | nd                        | 1.23 ± 0.32                | nd                        |
| Mucic acid lactone digallate               | 0.62 ± 0.25               | nd                        | 0.76 ± 0.06               | nd                        | 0.90 ± 0.35                | nd                        |
| Mucic acid methyl ester gallate            | nd                        | nd                        | nd                        | nd                        | nd                         | 1.32 ± 0.59               |
| Mucic acid methyl ester digallate          | 0.62 ± 0.17               | nd                        | 0.44 ± 0.04               | nd                        | 0.82 ± 0.30                | nd                        |
| Citric acid                                | 0.25 ± 0.04               | 0.68 ± 0.17               | 0.24 ± 0.02               | 0.62 ± 0.01               | 0.32 ± 0.12                | 11.77 ± 3.94              |
| Malic acid                                 | 0.15 ± 0.02               | nd                        | 0.23 ± 0.05               | nd                        | 0.33 ± 0.14                | nd                        |
| 1- <i>O</i> -protocatechuoyl-glucose       | nd                        | nd                        | nd                        | 1.02 ± 0.16               | nd                         | 0.93 ± 0.04               |
| Total                                      | 18.00 ± 2.82 <sup>a</sup> | 7.18 ± 0.61 <sup>c</sup>  | 6.81 ± 0.91 <sup>c</sup>  | 6.14 ± 0.60 <sup>c</sup>  | 11.9 ± 1.88 <sup>b</sup>   | 18.83 ± 4.13 <sup>a</sup> |
| <b>Flavan-3-ols (mg EE/100g DW)</b>        |                           |                           |                           |                           |                            |                           |
| (Epi)catechin                              | 0.02 ± 0.00               | 83.83 ± 9.70              | 0.02 ± 0.00               | 100.69 ± 6.46             | 0.02 ± 0.00                | 221.64 ± 24.73            |
| (Epi)catechin gallate                      | nd                        | 15.14 ± 3.67              | nd                        | 26.66 ± 6.38              | 0.04 ± 0.03                | 36.98 ± 7.73              |
| (Epi)catechin hexoside                     | nd                        | 3.04 ± 1.24               | nd                        | 3.48 ± 1.55               | nd                         | 5.66 ± 2.53               |
| (Epi)gallocatechin                         | nd                        | nd                        | nd                        | 0.82 ± 0.39               | nd                         | 1.07 ± 0.09               |
| (Epi)gallocatechin gallate                 | nd                        | 2.45 ± 0.29               | nd                        | 2.75 ± 0.07               | nd                         | 1.63 ± 0.16               |
| Methyl epigallocatechin -3-gallate         | 0.03 ± 0.00               | 27.96 ± 2.16              | 0.04 ± 0.01               | 29.35 ± 4.13              | 0.02 ± 0.01                | 19.54 ± 3.30              |
| Procyanidin A                              | nd                        | 0.48 ± 0.24               | nd                        | 0.91 ± 0.24               | nd                         | 0.63 ± 0.52               |
| Procyanidin B                              | nd                        | 3.20 ± 1.96               | nd                        | 10.69 ± 3.82              | nd                         | 22.64 ± 3.06              |
| Procyanidin trimer                         | nd                        | nd                        | nd                        | 0.30 ± 0.13               | nd                         | 0.63 ± 0.13               |
| Propelargonidin dimer                      | nd                        | 0.76 ± 0.25               | nd                        | 1.20 ± 0.28               | nd                         | 2.04 ± 0.69               |

**Supplementary Table 3 Cont.**

| Compounds <sup>2</sup>                 | Noble                    |                             | Carlos                   |                             | Granny Val               |                             |
|----------------------------------------|--------------------------|-----------------------------|--------------------------|-----------------------------|--------------------------|-----------------------------|
|                                        | skins                    | seeds                       | skins                    | seeds                       | skins                    | seeds                       |
| Propelargonidin trimer                 | nd                       | nd                          | nd                       | 0.64 ± 0.01                 | nd                       | nd                          |
| Total                                  | 0.05 ± 0.00 <sup>d</sup> | 136.88 ± 16.58 <sup>c</sup> | 0.06 ± 0.01 <sup>d</sup> | 177.49 ± 14.13 <sup>b</sup> | 0.09 ± 0.03 <sup>d</sup> | 312.45 ± 32.96 <sup>a</sup> |
| <b>Stilbens (mg REE/100g DW)</b>       |                          |                             |                          |                             |                          |                             |
| Resveratrol                            | 0.06 ± 0.00              | nd                          | nd                       | nd                          | 0.06 ± 0.00              | nd                          |
| Total                                  | 0.06 ± 0.00 <sup>a</sup> | nd                          | nd                       | nd                          | 0.06 ± 0.00 <sup>a</sup> | nd                          |
| <b>Cinnamic acids (mg CAE/100g DW)</b> |                          |                             |                          |                             |                          |                             |
| Ferulic acid                           | nd                       | nd                          | 0.22 ± 0.04              | nd                          | 0.59 ± 0.46              | nd                          |
| Total                                  | nd                       | nd                          | 0.22 ± 0.04 <sup>b</sup> | nd                          | 0.59 ± 0.46 <sup>a</sup> | nd                          |

<sup>1</sup> Values are expressed as means of triplicate determinations ± S.D. nd, not detected. For the total concentrations, different small letters within row indicate significant differences (Duncan's test,  $p = 0.05$ ).

<sup>2</sup> Ellagic acid, (-)-epicatechin, gallic acid, kaempferol, myricetin, penta-*O*-galloyl-glucose, quercetin, resveratrol, and rutin were quantified by their standard, respectively, and expressed as mg/100g DW. GAE: gallic acid equivalent; RE: rutin equivalent; EE: (-)-epicatechin equivalent; REE: resveratrol equivalent; CAE: caffeic acid equivalent.
