# Supplementary material for: Profile of Polyphenol Compounds of Five Muscadine Grapes Cultivated in the United States and in Newly Adapted Locations in China
Source: MDPI journal article supplement (doi:10.3390/ijms18030631), 2017-03-14
Supplement: s1 [file s1]

**Table S2.** Total and individual polyphenol concentrations identified in skins and seeds of five muscadine grapes from Nanning-Guangxi in the 2012 season.<sup>1</sup>

| Compounds <sup>2</sup>                                    | Noble         |               | Alachua       |              | Carlos       |              | Fry           |              | Granny Val    |               |
|-----------------------------------------------------------|---------------|---------------|---------------|--------------|--------------|--------------|---------------|--------------|---------------|---------------|
|                                                           | skins         | seeds         | skins         | seeds        | skins        | seeds        | skins         | seeds        | skins         | seeds         |
| <b>Ellagic acids and precursors (mg GAE/100g DW)</b>      |               |               |               |              |              |              |               |              |               |               |
| <i>Ellagic acid derivatives</i>                           |               |               |               |              |              |              |               |              |               |               |
| Ellagic acid                                              | 124.67 ± 3.16 | 144.15 ± 7.71 | 137.19 ± 3.21 | 32.31 ± 1.51 | 100.2 ± 7.53 | 39.61 ± 5.81 | 117.42 ± 5.69 | 28.45 ± 6.73 | 144.3 ± 12.96 | 46.18 ± 11.38 |
| Mono- <i>O</i> -methyl-ellagic acid                       | 2.82 ± 0.15   | 10.20 ± 0.53  | 6.56 ± 0.82   | 4.63 ± 0.48  | 3.02 ± 0.07  | 4.58 ± 0.26  | 8.22 ± 0.21   | 3.09 ± 0.55  | 6.43 ± 0.71   | 4.95 ± 0.22   |
| Mono- <i>O</i> -methyl-ellagic acid rhamnoside            | 0.71 ± 0.24   | 0.53 ± 0.00   | nd            | 0.55 ± 0.02  | nd           | 0.54 ± 0.00  | nd            | 0.53 ± 0.00  | nd            | nd            |
| Ducheside A                                               | 5.31 ± 1.68   | 7.11 ± 0.44   | 2.54 ± 1.33   | 0.92 ± 0.03  | 2.37 ± 0.83  | 2.08 ± 0.98  | 5.45 ± 0.52   | 1.26 ± 0.36  | 5.81 ± 2.69   | 1.11 ± 0.17   |
| Ducheside B                                               | 2.75 ± 1.00   | 29.14 ± 1.89  | 1.91 ± 0.65   | 6.49 ± 0.87  | 2.17 ± 0.73  | 9.60 ± 1.62  | 8.45 ± 0.74   | 12.41 ± 2.05 | 7.33 ± 3.44   | 12.35 ± 1.61  |
| Di- <i>O</i> -methyl-ellagic acid                         | 0.41 ± 0.02   | 6.08 ± 0.26   | 0.94 ± 0.03   | 1.58 ± 0.11  | 0.46 ± 0.01  | 1.21 ± 0.04  | 1.21 ± 0.02   | 1.41 ± 0.05  | 0.75 ± 0.15   | 2.33 ± 0.06   |
| Di- <i>O</i> -methyl-ellagic acid 4- <i>O</i> -rhamnoside | nd            | 0.56 ± 0.01   | nd            | 0.54 ± 0.01  | nd           | nd           | nd            | nd           | nd            | nd            |
| Tri- <i>O</i> -methyl-ellagic acid                        | 5.40 ± 0.22   | 4.81 ± 0.81   | 10.70 ± 0.66  | 4.96 ± 4.53  | 4.26 ± 0.25  | 2.20 ± 0.30  | 14.04 ± 1.69  | 2.34 ± 0.27  | 8.30 ± 1.97   | 3.48 ± 1.28   |
| Galloyl-tri- <i>O</i> -methyl-ellagic acid hexoside       | nd            | 0.79 ± 0.02   | nd            | nd           | nd           | nd           | nd            | 0.82 ± 0.00  | nd            | nd            |
| Ellagic acid glucoside                                    | 9.73 ± 0.34   | 5.52 ± 0.29   | 9.84 ± 1.25   | 1.79 ± 0.10  | 11.89 ± 2.03 | 2.15 ± 0.36  | 9.84 ± 1.10   | 2.74 ± 0.40  | 18.92 ± 4.65  | 3.61 ± 0.35   |
| Ellagic acid-coumaroyl hexoside                           | 0.19 ± 0.03   | nd            | nd            | nd           | 0.13 ± 0.02  | nd           | nd            | nd           | nd            | nd            |
| Ellagic acid-dihexoside                                   | 0.20 ± 0.02   | nd            | 0.26 ± 0.03   | nd           | 0.29 ± 0.12  | nd           | 0.58 ± 0.13   | nd           | 0.29 ± 0.15   | nd            |
| Ellagic acid derivative m/z 447                           | nd            | nd            | nd            | nd           | nd           | nd           | 0.55 ± 0.11   | nd           | 0.48 ± 0.18   | nd            |
| <i>Ellagitannins</i>                                      |               |               |               |              |              |              |               |              |               |               |
| Ellagitannin m/z 443                                      | nd            | 0.85 ± 0.04   | nd            | 1.33 ± 0.09  | 0.25 ± 0.06  | 1.05 ± 0.13  | 0.28 ± 0.03   | 0.98 ± 0.13  | 0.42 ± 0.18   | 1.06 ± 0.16   |
| Phloretin                                                 | nd            | 0.96 ± 0.11   | nd            | 1.56 ± 0.08  | nd           | 1.41 ± 0.07  | nd            | 1.12 ± 0.36  | 0.11 ± 0.00   | 1.15 ± 0.22   |
| Methyl brevifolin carboxylate                             | 24.91 ± 2.32  | 12.57 ± 1.00  | 27.12 ± 7.26  | 2.49 ± 0.69  | 29.07 ± 5.31 | 4.33 ± 0.91  | 16.59 ± 5.52  | 8.43 ± 2.23  | 25.89 ± 6.85  | 7.08 ± 2.90   |
| Valoneic acid dilactone                                   | 0.73 ± 0.04   | nd            | 0.78 ± 0.09   | nd           | 0.67 ± 0.16  | nd           | 0.54 ± 0.05   | nd           | 1.10 ± 0.29   | nd            |
| HHDP glucose                                              | 0.52 ± 0.15   | 4.19 ± 0.14   | 0.44 ± 0.20   | nd           | 0.28 ± 0.01  | 0.91 ± 0.14  | 0.36 ± 0.12   | 1.38 ± 0.10  | 0.75 ± 0.42   | nd            |
| Ellagitannin m/z 497                                      | 0.81 ± 0.33   | nd            | nd            | nd           | 0.61 ± 0.16  | nd           | 1.36 ± 0.57   | nd           | 1.36 ± 0.51   | nd            |
| Gallagic acid                                             | 0.54 ± 0.05   | nd            | 0.67 ± 0.06   | nd           | 0.40 ± 0.02  | nd           | 0.57 ± 0.07   | nd           | 0.73 ± 0.11   | nd            |
| Ellagitannin m/z 603                                      | 3.92 ± 0.12   | nd            | 4.15 ± 0.02   | nd           | 3.84 ± 0.51  | nd           | 4.15 ± 0.10   | nd           | 5.63 ± 1.01   | 0.53 ± 0.00   |
| Galloyl-HHDP-glucose (Corilagin, Strictinin)              | nd            | 1.90 ± 0.08   | 0.18 ± 0.09   | 0.63 ± 0.09  | nd           | 0.60 ± 0.23  | 0.20 ± 0.14   | 1.13 ± 0.08  | 0.26 ± 0.17   | 0.90 ± 0.25   |
| HHDP-galloyl-glucose (Isostrictinin)                      | nd            | 1.55 ± 0.65   | 0.13 ± 0.01   | 0.58 ± 0.02  | 0.11 ± 0.00  | 0.68 ± 0.01  | 0.12 ± 0.02   | 1.00 ± 0.18  | 0.22 ± 0.10   | 0.75 ± 0.05   |
| Ellagitannin m/z 633                                      | 0.41 ± 0.07   | nd            | 0.41 ± 0.15   | nd           | 0.27 ± 0.20  | nd           | 0.23 ± 0.17   | nd           | 0.19 ± 0.07   | nd            |
| Ellagitannin m/z 643                                      | nd            | nd            | 4.75 ± 0.93   | nd           | nd           | nd           | nd            | nd           | nd            | nd            |
| Ellagitannin m/z 671                                      | nd            | nd            | 0.71 ± 0.11   | nd           | 0.12 ± 0.01  | nd           | nd            | nd           | nd            | nd            |
| Ellagitannin m/z 681                                      | 0.78 ± 0.12   | nd            | 0.46 ± 0.07   | nd           | nd           | nd           | nd            | nd           | nd            | nd            |
| Ellagitannin m/z 689                                      | 0.77 ± 0.10   | nd            | 0.46 ± 0.11   | nd           | nd           | nd           | nd            | nd           | nd            | nd            |
| Ellagitannin m/z 721                                      | 0.13 ± 0.01   | nd            | 0.11 ± 0.01   | nd           | nd           | nd           | nd            | nd           | nd            | nd            |
| HHDP-galloyl-glucose (Isostrictinin)                      | nd            | 1.55 ± 0.65   | 0.13 ± 0.01   | 0.58 ± 0.02  | 0.11 ± 0.00  | 0.68 ± 0.01  | 0.12 ± 0.02   | 1.00 ± 0.18  | 0.22 ± 0.10   | 0.75 ± 0.05   |

Supplementary Table 2 Cont.

| Compounds <sup>2</sup>                         | Noble                           |                                | Alachua                         |                                | Carlos                         |                                | Fry                             |                                | Granny Val                     |                                |
|------------------------------------------------|---------------------------------|--------------------------------|---------------------------------|--------------------------------|--------------------------------|--------------------------------|---------------------------------|--------------------------------|--------------------------------|--------------------------------|
|                                                | skins                           | seeds                          | skins                           | seeds                          | skins                          | seeds                          | skins                           | seeds                          | skins                          | seeds                          |
| Ellagitannin m/z 779                           | 0.38 ± 0.04                     | nd                             | 0.38 ± 0.09                     | nd                             | 0.29 ± 0.06                    | nd                             | 0.63 ± 0.03                     | nd                             | 0.77 ± 0.29                    | nd                             |
| Pedunculagin α/β isomer<br>(Di-HHDP-glucose)   | nd                              | 0.81 ± 0.02                    | nd                              | nd                             | nd                             | 0.53 ± 0.00                    | nd                              | nd                             | nd                             | nd                             |
| Tellimagrandin I<br>(Digalloyl-HHDP-glucose)   | nd                              | 7.43 ± 0.76                    | 0.14 ± 0.01                     | 1.23 ± 0.15                    | nd                             | 1.27 ± 0.12                    | nd                              | 2.41 ± 0.29                    | nd                             | 1.68 ± 0.31                    |
| Ellagitannin m/z 797                           | nd                              | nd                             | 0.17 ± 0.04                     | nd                             | nd                             | nd                             | 0.40 ± 0.08                     | nd                             | 0.39 ± 0.17                    | nd                             |
| Isomallotinic acid                             | nd                              | 0.74 ± 0.02                    | nd                              | nd                             | nd                             | 0.89 ± 0.01                    | nd                              | nd                             | nd                             | nd                             |
| Ellagitannin m/z 831                           | nd                              | nd                             | nd                              | nd                             | 0.28 ± 0.03                    | nd                             | 0.73 ± 0.05                     | nd                             | 0.68 ± 0.31                    | nd                             |
| Ellagitannin m/z 861                           | 0.20 ± 0.01                     | nd                             | 0.18 ± 0.08                     | nd                             | nd                             | nd                             | 0.28 ± 0.01                     | nd                             | 0.34 ± 0.11                    | nd                             |
| Galloyl-bis-HHDP-glucose<br>(Casuarinin)       | nd                              | 0.95 ± 0.02                    | nd                              | nd                             | nd                             | 0.62 ± 0.02                    | nd                              | 0.59 ± 0.00                    | nd                             | nd                             |
| Tellimagrandin II<br>(Trigalloyl-HHDP-glucose) | nd                              | 1.41 ± 0.21                    | nd                              | 0.60 ± 0.01                    | nd                             | 0.60 ± 0.00                    | nd                              | 1.13 ± 0.09                    | nd                             | 0.79 ± 0.14                    |
| Chebulagic acid                                | nd                              | nd                             | nd                              | nd                             | nd                             | 0.66 ± 0.07                    | nd                              | nd                             | nd                             | nd                             |
| Ellagitannin m/z 957                           | 0.18 ± 0.02                     | nd                             | 0.24 ± 0.03                     | nd                             | 0.22 ± 0.04                    | nd                             | 0.24 ± 0.05                     | nd                             | 0.31 ± 0.05                    | nd                             |
| Ellagitannin m/z 967                           | nd                              | 0.69 ± 0.05                    | nd                              | 0.71 ± 0.08                    | nd                             | 0.73 ± 0.06                    | nd                              | nd                             | nd                             | 0.66 ± 0.04                    |
| <b>Precursors (Gallic acid derivatives)</b>    |                                 |                                |                                 |                                |                                |                                |                                 |                                |                                |                                |
| Gallic acid                                    | 3.09 ± 0.58                     | 46.24 ± 7.22                   | 2.48 ± 0.74                     | 48.98 ± 7.67                   | 1.64 ± 0.61                    | 46.45 ± 10.91                  | 1.65 ± 0.22                     | 35.36 ± 2.55                   | 3.64 ± 1.38                    | 34.89 ± 4.04                   |
| Methyl gallate                                 | 6.38 ± 0.39                     | 16.39 ± 8.10                   | 5.73 ± 1.28                     | 10.27 ± 2.14                   | 5.91 ± 3.52                    | 51.85 ± 7.42                   | 6.13 ± 2.05                     | 40.09 ± 12.69                  | 10.44 ± 2.31                   | 4.04 ± 3.29                    |
| Di- <i>O</i> -galloyl quinic acid              | 0.39 ± 0.04                     | nd                             | 0.25 ± 0.14                     | nd                             | 0.22 ± 0.03                    | nd                             | 0.16 ± 0.02                     | nd                             | 1.26 ± 1.08                    | nd                             |
| Mono- <i>O</i> -galloyl-glucose                | 0.43 ± 0.13                     | 6.35 ± 0.88                    | 0.57 ± 0.19                     | 4.31 ± 0.55                    | 0.31 ± 0.12                    | 4.06 ± 1.01                    | 0.28 ± 0.03                     | 9.07 ± 2.63                    | 0.72 ± 0.32                    | 7.79 ± 4.31                    |
| Di- <i>O</i> -galloyl-glucose                  | 0.51 ± 0.14                     | 0.67 ± 0.02                    | 0.54 ± 0.29                     | 0.76 ± 0.14                    | 0.50 ± 0.20                    | 0.64 ± 0.03                    | 0.52 ± 0.02                     | 0.69 ± 0.02                    | 0.75 ± 0.15                    | 0.69 ± 0.05                    |
| Tri- <i>O</i> -galloyl-glucose                 | nd                              | 4.90 ± 0.93                    | nd                              | 5.48 ± 0.08                    | 0.11 ± 0.00                    | 2.57 ± 0.15                    | 0.07 ± 0.06                     | 4.39 ± 2.19                    | 0.16 ± 0.09                    | 3.57 ± 1.20                    |
| Tetra- <i>O</i> -galloyl-glucose               | nd                              | 15.41 ± 1.61                   | nd                              | 26.86 ± 1.72                   | nd                             | 14.68 ± 0.57                   | nd                              | 17.73 ± 0.96                   | nd                             | 12.00 ± 0.70                   |
| Penta- <i>O</i> -galloyl-glucose               | nd                              | 234.88 ± 24.39                 | nd                              | 418.34 ± 26.94                 | nd                             | 209.93 ± 12.71                 | nd                              | 307.42 ± 56.71                 | nd                             | 246.49 ± 41.84                 |
| Total                                          | 197.25 ±<br>4.34 <sup>d,e</sup> | 567.76 ±<br>38.01 <sup>a</sup> | 220.99 ±<br>6.92 <sup>d,e</sup> | 577.89 ±<br>27.30 <sup>a</sup> | 169.89 ±<br>13.49 <sup>e</sup> | 406.42 ±<br>24.46 <sup>c</sup> | 201.26 ±<br>2.27 <sup>d,e</sup> | 486.00 ±<br>58.05 <sup>b</sup> | 248.73 ±<br>22.72 <sup>d</sup> | 398.08 ±<br>49.60 <sup>c</sup> |
| <b>Flavonols (mg RE/100g DW)</b>               |                                 |                                |                                 |                                |                                |                                |                                 |                                |                                |                                |
| Myricetin                                      | 0.40 ± 0.27                     | nd                             | 0.14 ± 0.08                     | nd                             | nd                             | nd                             | nd                              | nd                             | nd                             | nd                             |
| Myricetin tri-methyl ether                     | 9.81 ± 1.97                     | nd                             | 8.86 ± 1.59                     | nd                             | 13.81 ± 1.71                   | nd                             | 30.81 ± 4.16                    | nd                             | 24.18 ± 6.12                   | 0.30 ± 0.10                    |
| Myricetin 3- <i>O</i> -glucuronide             | 0.54 ± 0.17                     | nd                             | 0.43 ± 0.21                     | nd                             | 0.35 ± 0.16                    | nd                             | nd                              | nd                             | 1.42 ± 0.31                    | nd                             |
| Myricetin 3- <i>O</i> -glucoside               | 0.51 ± 0.13                     | nd                             | 1.03 ± 1.02                     | nd                             | nd                             | nd                             | nd                              | nd                             | 0.15 ± 0.03                    | nd                             |
| Myricetin 3,4'-diglucoside                     | 0.22 ± 0.02                     | nd                             | 0.24 ± 0.07                     | nd                             | nd                             | nd                             | nd                              | nd                             | nd                             | nd                             |
| Quercetin                                      | 0.96 ± 0.47                     | nd                             | 1.82 ± 0.71                     | nd                             | 0.24 ± 0.11                    | nd                             | 0.70 ± 0.61                     | nd                             | 1.99 ± 1.90                    | nd                             |
| Quercetin 3-glucuronide                        | 0.33 ± 0.11                     | nd                             | 0.43 ± 0.02                     | nd                             | nd                             | nd                             | nd                              | nd                             | 0.34 ± 0.05                    | nd                             |
| Quercetin 3- <i>O</i> -glucoside               | 1.16 ± 0.12                     | 0.14 ± 0.03                    | 1.27 ± 0.05                     | 0.12 ± 0.02                    | nd                             | 0.12 ± 0.03                    | nd                              | 0.10 ± 0.01                    | nd                             | nd                             |
| Quercetin malonyl glucoside                    | nd                              | nd                             | nd                              | nd                             | nd                             | 0.08 ± 0.00                    | nd                              | nd                             | nd                             | nd                             |
| Rutin                                          | 0.11 ± 0.02                     | nd                             | nd                              | nd                             | nd                             | nd                             | nd                              | nd                             | nd                             | nd                             |
| Quercetin 3,4'-diglucoside                     | 0.78 ± 0.07                     | nd                             | 0.78 ± 0.09                     | nd                             | nd                             | nd                             | nd                              | nd                             | nd                             | nd                             |

Supplementary Table 2 Cont.

| Compounds <sup>2</sup>                     | Noble                     |                          | Alachua                   |                           | Carlos                    |                           | Fry                       |                          | Granny Val                |                           |
|--------------------------------------------|---------------------------|--------------------------|---------------------------|---------------------------|---------------------------|---------------------------|---------------------------|--------------------------|---------------------------|---------------------------|
|                                            | skins                     | seeds                    | skins                     | seeds                     | skins                     | seeds                     | skins                     | seeds                    | skins                     | seeds                     |
| Dihydroquercetin                           | nd                        | 2.93 ± 0.86              | nd                        | 4.74 ± 0.27               | nd                        | 6.26 ± 1.19               | nd                        | 3.79 ± 2.59              | nd                        | 2.96 ± 1.81               |
| Dihydroquercetin 3- <i>O</i> -hexoside     | 0.78 ± 0.15               | nd                       | 0.70 ± 0.10               | nd                        | 1.02 ± 0.12               | nd                        | 0.42 ± 0.17               | nd                       | 1.48 ± 0.54               | nd                        |
| Dihydroquercetin caffeoyl glucoside        | 4.55 ± 0.57               | nd                       | 1.02 ± 0.15               | nd                        | nd                        | nd                        | nd                        | nd                       | nd                        | nd                        |
| Kaempferol                                 | 0.21 ± 0.15               | nd                       | 0.15 ± 0.11               | nd                        | nd                        | nd                        | 0.28 ± 0.10               | nd                       | nd                        | nd                        |
| Kaempferol 3- <i>O</i> -rhamnoside         | 0.79 ± 0.14               | nd                       | 1.86 ± 0.32               | 0.10 ± 0.01               | 2.62 ± 1.17               | nd                        | 2.18 ± 0.80               | nd                       | 2.19 ± 0.79               | nd                        |
| Kaempferol 3- <i>O</i> -glucoside          | 1.14 ± 0.25               | 2.43 ± 0.71              | 0.16 ± 0.01               | 1.91 ± 0.30               | nd                        | 0.83 ± 0.34               | 0.57 ± 0.05               | 1.18 ± 0.50              | nd                        | 1.59 ± 0.83               |
| Amurensin                                  | nd                        | nd                       | nd                        | nd                        | 0.38 ± 0.08               | nd                        | 0.20 ± 0.06               | nd                       | 0.33 ± 0.06               | nd                        |
| Kaempferol acetyl glucoside                | nd                        | nd                       | 1.02 ± 0.25               | nd                        | 0.85 ± 0.11               | nd                        | nd                        | nd                       | nd                        | 0.09 ± 0.01               |
| Kaempferol dihexose                        | 0.69 ± 0.03               | nd                       | nd                        | nd                        | nd                        | nd                        | nd                        | nd                       | nd                        | nd                        |
| Kaempferol 3- <i>O</i> -rutinoside         | nd                        | nd                       | 0.36 ± 0.13               | nd                        | 0.52 ± 0.13               | nd                        | 0.40 ± 0.12               | nd                       | 0.32 ± 0.18               | nd                        |
| Dihydrokaempferol 3- <i>O</i> -arabinoside | 0.36 ± 0.01               | 0.10 ± 0.01              | 0.19 ± 0.07               | 0.11 ± 0.02               | 0.11 ± 0.00               | nd                        | 0.08 ± 0.00               | nd                       | 0.08 ± 0.00               | 0.09 ± 0.00               |
| Dihydrokaempferol 7- <i>O</i> -glucoside   | nd                        | nd                       | nd                        | 0.99 ± 0.05               | nd                        | 1.44 ± 0.18               | nd                        | 1.19 ± 0.05              | nd                        | 3.23 ± 0.35               |
| Isorhamnetin                               | nd                        | 1.20 ± 0.59              | nd                        | 1.45 ± 0.18               | nd                        | 1.70 ± 0.30               | nd                        | 1.54 ± 1.11              | nd                        | 1.35 ± 0.92               |
| Isorhamnetin 3-glucuronide                 | nd                        | nd                       | 0.08 ± 0.01               | nd                        | 0.15 ± 0.04               | nd                        | 0.33 ± 0.01               | nd                       | 0.28 ± 0.03               | nd                        |
| Isorhamnetin 3-glucoside                   | nd                        | 0.14 ± 0.03              | 0.61 ± 0.06               | nd                        | nd                        | nd                        | nd                        | 0.19 ± 0.07              | nd                        | 0.20 ± 0.06               |
| Laricitrin                                 | 0.10 ± 0.01               | nd                       | 0.12 ± 0.02               | nd                        | 0.11 ± 0.04               | nd                        | 0.43 ± 0.07               | nd                       | 0.13 ± 0.06               | nd                        |
| Laricitrin 3- <i>O</i> -glucoside          | 1.20 ± 0.24               | 0.08 ± 0.01              | 1.05 ± 0.18               | 0.09 ± 0.01               | nd                        | 0.08 ± 0.00               | 0.09 ± 0.01               | nd                       | nd                        | nd                        |
| Syringetin                                 | 0.47 ± 0.14               | nd                       | 2.23 ± 2.27               | nd                        | 0.64 ± 0.33               | nd                        | 2.41 ± 1.80               | nd                       | 1.02 ± 0.36               | nd                        |
| Syringetin 3-glucoside                     | 1.16 ± 0.08               | nd                       | nd                        | nd                        | nd                        | nd                        | nd                        | nd                       | nd                        | nd                        |
| Total                                      | 26.28 ± 3.94 <sup>b</sup> | 7.03 ± 0.96 <sup>c</sup> | 24.54 ± 4.66 <sup>b</sup> | 9.5 ± 0.16 <sup>c</sup>   | 20.79 ± 2.97 <sup>b</sup> | 10.52 ± 1.21 <sup>c</sup> | 38.92 ± 5.11 <sup>a</sup> | 7.98 ± 3.35 <sup>c</sup> | 33.9 ± 6.10 <sup>a</sup>  | 9.82 ± 1.75 <sup>c</sup>  |
| <b>Benzoic acids (mg GAE/100g DW)</b>      |                           |                          |                           |                           |                           |                           |                           |                          |                           |                           |
| Vanillic acid                              | 0.16 ± 0.05               | nd                       | 0.11 ± 0.00               | nd                        | nd                        | nd                        | nd                        | nd                       | 0.11 ± 0.00               | nd                        |
| Vanillic acid 4-glucoside                  | 0.83 ± 0.40               | 0.57 ± 0.03              | 0.27 ± 0.08               | 0.58 ± 0.03               | nd                        | nd                        | nd                        | 0.55 ± 0.01              | nd                        | 0.57 ± 0.02               |
| Syringic acid                              | 0.18 ± 0.02               | 1.97 ± 0.06              | 0.15 ± 0.01               | 1.09 ± 0.03               | nd                        | 3.26 ± 0.25               | nd                        | 2.08 ± 0.06              | 0.12 ± 0.01               | 2.72 ± 0.18               |
| Mono-hydroxybenzoic acid                   | 0.18 ± 0.03               | nd                       | 0.18 ± 0.00               | 0.53 ± 0.00               | 0.20 ± 0.01               | 0.53 ± 0.00               | 0.21 ± 0.00               | 0.53 ± 0.00              | 0.18 ± 0.01               | 0.53 ± 0.00               |
| Di-hydroxybenzoic acid                     | 0.90 ± 0.05               | 0.60 ± 0.01              | 0.70 ± 0.02               | 0.58 ± 0.01               | 0.70 ± 0.06               | 0.60 ± 0.01               | 0.80 ± 0.18               | 0.57 ± 0.01              | 0.89 ± 0.37               | 0.62 ± 0.04               |
| Di-hydroxybenzate ethyl ester              | nd                        | nd                       | 0.12 ± 0.00               | nd                        | nd                        | nd                        | nd                        | nd                       | nd                        | nd                        |
| Brevifolin carboxylic acid                 | 20.48 ± 1.21              | 0.73 ± 0.17              | nd                        | 0.64 ± 0.07               | 17.72 ± 5.18              | 0.57 ± 0.02               | 15.94 ± 1.10              | 0.64 ± 0.07              | 22.73 ± 6.92              | 0.62 ± 0.05               |
| Mucic acid digallate                       | 0.37 ± 0.08               | nd                       | 0.55 ± 0.32               | nd                        | 0.49 ± 0.11               | nd                        | 0.50 ± 0.39               | nd                       | 0.67 ± 0.09               | nd                        |
| Mucic acid lactone digallate               | 0.37 ± 0.06               | nd                       | 0.61 ± 0.44               | nd                        | 0.39 ± 0.10               | 0.54 ± 0.01               | 0.52 ± 0.31               | nd                       | 0.76 ± 0.26               | nd                        |
| Mucic acid methyl ester gallate            | 12.40 ± 1.72              | nd                       | 4.40 ± 2.64               | 2.07 ± 0.22               | 1.10 ± 0.28               | nd                        | 3.52 ± 0.26               | nd                       | 7.23 ± 6.66               | nd                        |
| Mucic acid methyl ester digallate          | 0.39 ± 0.07               | 0.55 ± 0.01              | 0.42 ± 0.13               | nd                        | 0.31 ± 0.08               | nd                        | 0.16 ± 0.05               | nd                       | 0.49 ± 0.23               | nd                        |
| Citric acid                                | nd                        | 13.74 ± 5.71             | nd                        | 12.53 ± 4.02              | 0.13 ± 0.01               | 0.69 ± 0.16               | nd                        | 1.13 ± 0.76              | nd                        | 13.15 ± 1.89              |
| 1- <i>O</i> -protocatechuoyl-glucose       | 0.35 ± 0.07               | 0.94 ± 0.03              | nd                        | 1.09 ± 0.03               | 0.39 ± 0.18               | 1.03 ± 0.07               | 0.71 ± 0.05               | 1.12 ± 0.15              | 0.79 ± 0.3                | 1.46 ± 0.11               |
| Total                                      | 36.6 ± 1.61 <sup>a</sup>  | 19.1 ± 5.58 <sup>b</sup> | 7.51 ± 2.75 <sup>c</sup>  | 19.11 ± 4.02 <sup>b</sup> | 21.42 ± 5.41 <sup>b</sup> | 7.22 ± 0.48 <sup>c</sup>  | 22.37 ± 0.73 <sup>b</sup> | 6.62 ± 0.92 <sup>c</sup> | 33.97 ± 8.38 <sup>a</sup> | 19.65 ± 1.93 <sup>b</sup> |
| <b>Flavan-3-ols (mg EE/100g DW)</b>        |                           |                          |                           |                           |                           |                           |                           |                          |                           |                           |
| (Epi)catechin                              | 0.03 ± 0.00               | 78.91 ± 7.00             | 0.02 ± 0.00               | 156.6 ± 10.15             | 0.02 ± 0.00               | 166.63 ± 11.34            | 0.02 ± 0.00               | 100.37 ± 20.38           | 0.02 ± 0.00               | 112.43 ± 28.92            |
| (Epi)catechin gallate                      | nd                        | 17.34 ± 1.12             | nd                        | 38.49 ± 7.98              | nd                        | 32.95 ± 5.70              | 0.02 ± 0.00               | 25.19 ± 1.67             | nd                        | 27.10 ± 2.29              |
| (Epi)catechin hexoside                     | 0.03 ± 0.00               | 1.61 ± 0.16              | nd                        | 6.46 ± 0.67               | 0.03 ± 0.01               | 4.97 ± 0.92               | nd                        | 2.09 ± 0.50              | nd                        | 2.02 ± 0.10               |

Supplementary Table 2 *Cont.*

| Compounds <sup>2</sup>                 | Noble                    |                             | Alachua                  |                             | Carlos                   |                             | Fry                      |                             | Granny Val               |                             |
|----------------------------------------|--------------------------|-----------------------------|--------------------------|-----------------------------|--------------------------|-----------------------------|--------------------------|-----------------------------|--------------------------|-----------------------------|
|                                        | skins                    | seeds                       |
| (Epi)gallocatechin                     | 0.02 ± 0.00              | 1.26 ± 0.40                 | nd                       | 1.98 ± 0.26                 | nd                       | 0.92 ± 0.15                 | nd                       | 1.46 ± 0.30                 | nd                       | 1.43 ± 0.54                 |
| (Epi)gallocatechin gallate             | nd                       | 1.29 ± 0.38                 | nd                       | 2.40 ± 0.83                 | nd                       | 3.20 ± 1.10                 | 0.02 ± 0.00              | 1.48 ± 0.40                 | nd                       | 1.42 ± 0.09                 |
| Methyl epigallocatechin -3-gallate     | nd                       | 21.91 ± 10.23               | 0.03 ± 0.01              | 19.41 ± 4.48                | nd                       | 25.47 ± 0.52                | nd                       | 22.13 ± 7.91                | 0.02 ± 0.00              | 16.51 ± 7.10                |
| Procyanidin A                          | nd                       | 0.27 ± 0.24                 | nd                       | 0.09 ± 0.09                 | nd                       | 1.07 ± 0.23                 | nd                       | 0.60 ± 0.50                 | nd                       | 0.69 ± 1.02                 |
| Procyanidin B                          | nd                       | 5.82 ± 0.77                 | nd                       | 24.48 ± 2.11                | nd                       | 15.01 ± 1.17                | nd                       | 14.05 ± 7.51                | nd                       | 9.65 ± 4.37                 |
| Procyanidin trimer                     | nd                       | 0.03 ± 0.03                 | nd                       | 0.46 ± 0.23                 | 0.02 ± 0.00              | 0.42 ± 0.17                 | nd                       | 0.44 ± 0.45                 | nd                       | 0.21 ± 0.09                 |
| Propelargonidin dimer                  | nd                       | nd                          | nd                       | 0.59 ± 0.02                 | nd                       | nd                          | nd                       | nd                          | nd                       | 1.09 ± 0.22                 |
| Total                                  | 0.08 ± 0.00 <sup>d</sup> | 128.43 ± 12.16 <sup>c</sup> | 0.05 ± 0.01 <sup>d</sup> | 250.96 ± 21.35 <sup>a</sup> | 0.08 ± 0.01 <sup>d</sup> | 250.65 ± 16.96 <sup>a</sup> | 0.07 ± 0.00 <sup>d</sup> | 167.81 ± 21.66 <sup>b</sup> | 0.04 ± 0.00 <sup>d</sup> | 172.55 ± 33.17 <sup>b</sup> |
| <b>Stilbens (mg REE/100g DW)</b>       |                          |                             |                          |                             |                          |                             |                          |                             |                          |                             |
| Resveratrol                            | nd                       | nd                          | 0.06 ± 0.00              | nd                          | 0.06 ± 0.00              | nd                          | nd                       | nd                          | 0.06 ± 0.00              | nd                          |
| Resveratrol 3- <i>O</i> -glucoside     | nd                       | nd                          | nd                       | nd                          | 0.12 ± 0.01              | nd                          | nd                       | nd                          | nd                       | nd                          |
| Total                                  | nd                       | nd                          | 0.06 ± 0.00 <sup>b</sup> | nd                          | 0.18 ± 0.01 <sup>a</sup> | nd                          | nd                       | nd                          | 0.06 ± 0.00 <sup>b</sup> | nd                          |
| <b>Cinnamic acids (mg CAE/100g DW)</b> |                          |                             |                          |                             |                          |                             |                          |                             |                          |                             |
| Di-coumaroyl hexose                    | nd                       | nd                          | nd                       | nd                          | 0.14 ± 0.07              | nd                          | nd                       | nd                          | nd                       | nd                          |
| Total                                  | nd                       | nd                          | nd                       | nd                          | 0.14 ± 0.07 <sup>a</sup> | nd                          | nd                       | nd                          | nd                       | nd                          |

<sup>1</sup> Values are expressed as means of triplicate determinations ± S.D. nd, not detected. For the total concentrations, different small letters within row indicate significant differences (Duncan's test,  $p = 0.05$ ).

<sup>2</sup> Ellagic acid, (-)-epicatechin, gallic acid, kaempferol, myricetin, penta-*O*-galloyl-glucose, quercetin, resveratrol, and rutin are quantified by their standard, respectively, and expressed as mg/100g DW. GAE: gallic acid equivalent; RE: rutin equivalent; EE: (-)-epicatechin equivalent; REE: resveratrol equivalent; CAE: caffeic acid equivalent.
