# Supplementary material for: Profile of Polyphenol Compounds of Five Muscadine Grapes Cultivated in the United States and in Newly Adapted Locations in China
Source: MDPI journal article supplement (doi:10.3390/ijms18030631), 2017-03-14
Supplement: s1 [file s1]

**Table S4** Retention time (RT), Triple TOF-MS/MS *m/z* values, and formula of polyphenol compounds identified in five muscadine grape skins and seeds cultivated in different regions in the 2012 and 2013 seasons.<sup>1</sup>

| Compounds                                                 | RT (min) | [M-H] <sup>-</sup> (m/z) | UPLC-Triple TOF-MS/MS (m/z) <sup>2</sup>                                                                                                                                                                                       | Formula   |
|-----------------------------------------------------------|----------|--------------------------|--------------------------------------------------------------------------------------------------------------------------------------------------------------------------------------------------------------------------------|-----------|
| <b>Ellagic acids and precursors</b>                       |          |                          |                                                                                                                                                                                                                                |           |
| <i>Ellagic acid derivatives</i>                           |          |                          |                                                                                                                                                                                                                                |           |
| Ellagic acid-coumaroyl hexoside                           | 6.40     | 609.1101                 | 609.1186[M-H] <sup>-</sup> , 445.0438[M-H-Glc] <sup>-</sup> , 301.0001[M-H-Glc-Cou] <sup>-</sup> , 299.9914                                                                                                                    | C26H26O17 |
| Ellagic acid glucoside                                    | 6.69     | 463.0520                 | 463.0559[M-H] <sup>-</sup> , 301.0008[M-H-Glc] <sup>-</sup> , 299.9929                                                                                                                                                         | C20H16O13 |
| Mono- <i>O</i> -methyl-ellagic acid rhamnoside            | 6.79     | 463.0537                 | 415.1616, 299.0574, 298.0498, 284.0333, 283.0226, 269.1046, 256.0370, 161.0455                                                                                                                                                 | C22H22O11 |
| Ducheside B                                               | 7.45     | 433.0408                 | 433.0438, 300.9995, 299.9922                                                                                                                                                                                                   | C19H14O12 |
| Ducheside A                                               | 7.72     | 447.0567                 | 447.0580[M-H] <sup>-</sup> , 300.9991, 299.9916                                                                                                                                                                                | C20H16O12 |
| Ellagic acid                                              | 8.28     | 300.9992                 | 300.9986[M-H] <sup>-</sup> , 283.9956, 245.0083, 229.0137, 201.0186, 185.0238, 173.0236, 145.0290                                                                                                                              | C14H6O8   |
| Ellagic acid-dihexoside                                   | 8.34     | 624.9959                 | 300.9987                                                                                                                                                                                                                       | C23H14O21 |
| Mono- <i>O</i> -methyl ellagic acid deoxyhexoside         | 8.12     | 461.0725                 | 461.0352[M-H] <sup>-</sup> , 299.0168[M-H-Glc] <sup>-</sup> , 271.0265, 255.0280, 231.0293, 227.0370, 221.0459, 163.0026                                                                                                       | C21H18O12 |
| Ellagic acid derivative <i>m/z</i> 447                    | 9.21     | 447.1823                 | 447.1077[M-H] <sup>-</sup> , 301.0017, 299.9909, 298.9828, 285.0405, 284.0365, 227.0375, 175.0029, 151.0034                                                                                                                    | C27H28O6  |
| Di- <i>O</i> -methyl ellagic acid-4- <i>O</i> -rhamnoside | 9.30     | 475.0877                 | 313.0395, 298.0145, 254.0239, 245.0426, 226.0258, 75.0097                                                                                                                                                                      | C22H20O12 |
| Mono- <i>O</i> -methyl-ellagic acid                       | 10.08    | 315.0144                 | 299.991[M-CH <sub>3</sub> ] <sup>-</sup>                                                                                                                                                                                       | C15H8O8   |
| Galloyl-tri- <i>O</i> -methyl-ellagic acid hexoside       | 10.55    | 657.1127                 | 657.1126[M-H] <sup>-</sup> , 491.0821, 343.0484, 329.0313, 328.0224, 314.0152, 313.0551, 287.0588, 169.0140                                                                                                                    | C30H26O17 |
| Di- <i>O</i> -methyl ellagic acid                         | 12.35    | 329.0306                 | 314.0075, 298.9845, 270.9890, 242.9931                                                                                                                                                                                         | C16H10O8  |
| Tri- <i>O</i> -methyl-ellagic acid                        | 15.25    | 343.0462                 | 328.0236, 313.0003, 297.9767, 285.0050, 269.9813                                                                                                                                                                               | C17H12O8  |
| <i>Ellagitannins</i>                                      |          |                          |                                                                                                                                                                                                                                |           |
| HHDP-glucose                                              | 1.62     | 481.0621                 | 481.0637[M-H] <sup>-</sup> , 300.9988, 275.0201                                                                                                                                                                                | C20H18O14 |
| HHDP-galloyl-glucose (Isostrictinin)                      | 3.22     | 633.0739                 | 633.1528[M-H] <sup>-</sup> , 487.1357, 355.1228, 325.0773, 300.9988, 275.0209, 249.0403, 163.0249                                                                                                                              | C27H22O18 |
| Galloyl-HHDP-hexose (Corilagin, Strictinin)               | 3.29     | 633.0738                 | 633.0756[M-H] <sup>-</sup> , 487.1359, 309.1203, 300.9988[M-H-Gall-Hex] <sup>-</sup> , 275.0209, 169.0157[M-H-HHDP-Hex] <sup>-</sup> , 145.0256, 130.9983, 112.9882, 103.0038                                                  | C27H22O18 |
| Ellagitannin <i>m/z</i> 633                               | 3.35     | 633.1529                 | 633.1545[M-H] <sup>-</sup> , 453.0648, 409.0765, 300.9982, 275.0242, 247.0243, 163.0251, 145.0139                                                                                                                              | C22H34O21 |
| Pedunculagin α/β isomer (Di-HHDP-glucose)                 | 3.43     | 783.0684                 | 783.0727[M-H] <sup>-</sup> , 481.0609[M-H-HHDP] <sup>-</sup> , 300.9990, 275.0210                                                                                                                                              | C34H24O22 |
| Eriodictyol coumaroyl hexose                              | 3.61     | 595.1461                 | 289.0715, 245.0810, 203.0837, 153.0191, 151.0030                                                                                                                                                                               | C30H28O13 |
| Ellagitannin <i>m/z</i> 689                               | 3.97     | 689.1576                 | 643.1553, 517.1244, 481.0998, 463.0902, 355.0680, 329.0889, 301.0360, 283.0251, 193.0142, 175.0039                                                                                                                             | C28H34O20 |
| Ellagitannin <i>m/z</i> 643                               | 4.05     | 643.1521                 | 643.1555[M-H] <sup>-</sup> , 481.1009[M-H-Gall] <sup>-</sup> , 463.0935, 355.0683, 329.0890, 301.0360, 283.0260, 193.0151, 175.0044, 125.0250                                                                                  | C27H32O18 |
| Ellagitannin <i>m/z</i> 681                               | 4.12     | 681.1302                 | 645.1669, 643.1601, 481.1047[M-H-Glc] <sup>-</sup> , 463.0884[M-H-H <sub>2</sub> O] <sup>-</sup> , 355.0708, 301.0336[M-H-H <sub>2</sub> O-Glc] <sup>-</sup> , 283.0303, 193.0145, 175.0030                                    | C29H30O19 |
| Ellagitannin <i>m/z</i> 671                               | 4.14     | 671.1476                 | 625.1435, 463.0892, 462.0808, 301.0344, 300.0262, 299.0190                                                                                                                                                                     | C28H32O19 |
| Ellagitannin <i>m/z</i> 497                               | 4.39     | 497.0573                 | 393.0498, 333.0295, 300.9961[M-H-H <sub>2</sub> O-178] <sup>-</sup> , 298.9841, 273.0035, 247.0255, 245.0098, 203.0361                                                                                                         | C20H18O15 |
| Ellagitannin <i>m/z</i> 443                               | 5.29     | 443.1922                 | 443.1954[M-H] <sup>-</sup> , 237.1466, 189.1307, 119.0347, 101.0234, 89.0249, 71.0143                                                                                                                                          | C21H32O10 |
| Tellimagrandin I (Digalloyl-HHDP-glucose)                 | 6.71     | 785.0848                 | 785.0892[M-H] <sup>-</sup> , 300.9995, 275.0202                                                                                                                                                                                | C34H26O22 |
| Galloyl-bis-HHDP-glucose (Casuarictin)                    | 6.97     | 935.0790                 | 935.0831[M-H] <sup>-</sup> , 633.0771[M-H-HHDP] <sup>-</sup> , 300.9985[M-H-2HHDP] <sup>-</sup>                                                                                                                                | C41H28O26 |
| Ellagitannin <i>m/z</i> 957                               | 7.01     | 957.0911                 | 957.0971[M-H] <sup>-</sup> , 897.0774, 821.0507, 783.0729, 763.0500, 701.0725, 481.0675, 301.0004                                                                                                                              | C33H34O33 |
| Valoneic acid dilactone                                   | 7.02     | 469.0053                 | 300.9997, 299.9898, 298.9864, 275.0032, 270.9903                                                                                                                                                                               | C21H10O13 |
| Ellagitannin <i>m/z</i> 831                               | 7.54     | 831.0539                 | 831.0599[M-H] <sup>-</sup> , 787.0685, 769.0581, 723.0518, 697.0780, 300.9988, 298.9847, 273.0024, 247.0248, 245.0094                                                                                                          | C34H24O25 |
| Isomallotinic acid                                        | 7.73     | 801.0784                 | 783.0758, 765.0657, 649.0741[M-H-Gall] <sup>-</sup> , 615.0676, 613.0500, 597.0564, 300.9999, 298.9850                                                                                                                         | C34H26O23 |
| Ellagitannin <i>m/z</i> 861                               | 7.80     | 861.0655                 | 815.0670, 797.0557, 779.0377, 751.0472, 733.0433, 435.0606, 301.0007, 298.9844, 291.0158, 247.0254                                                                                                                             | C35H26O26 |
| Punicalin α/β isomer                                      | 7.84     | 781.0528                 | 781.0630[M-H] <sup>-</sup> , 763.0379, 753.0547, 745.0312, 735.0444, 451.0524, 449.0371, 300.9995, 298.9830                                                                                                                    | C34H22O22 |
| Ellagitannin <i>m/z</i> 779                               | 7.95     | 779.0432                 | 751.0499[M-H-CO <sub>2</sub> ] <sup>-</sup> , 733.0388, 449.0383[M-H-CO <sub>2</sub> -HHDP] <sup>-</sup> , 300.9986, 298.9850, 286.9832[M-H-CO <sub>2</sub> -HHDP-Hex-1] <sup>-</sup> , 275.0200, 261.0049, 214.9970, 145.0128 | C27H24O27 |
| Ellagitannin <i>m/z</i> 721                               | 8.19     | 721.1061                 | 419.1012[M-H-HHDP] <sup>-</sup> , 301.0003                                                                                                                                                                                     | C34H26O18 |
| Tellimagrandin II (Trigalloyl-HHDP-glucose)               | 8.19     | 937.0972                 | 937.1016[M-H] <sup>-</sup> , 785.0884[M-H-Gall] <sup>-</sup> , 635.0941, 300.9991                                                                                                                                              | C41H30O26 |
| Methyl brevifolin carboxylate                             | 8.26     | 305.0305                 | 305.0334[M-H] <sup>-</sup> , 273.0046, 245.0103, 229.0146, 201.0192, 189.0197, 173.0230, 145.0295, 133.0297, 117.0344                                                                                                          | C14H10O8  |

Supplementary Table 4 Cont.

| Compounds                                   | RT (min) | [M-H] <sup>-</sup> (m/z) | UPLC-Triple TOF-MS/MS (m/z) <sup>2</sup>                                                                                                                                                                                              | Formula   |
|---------------------------------------------|----------|--------------------------|---------------------------------------------------------------------------------------------------------------------------------------------------------------------------------------------------------------------------------------|-----------|
| Ellagitannin m/z 797                        | 8.27     | 797.0475                 | 751.0471, 733.0371, 300.9989, 298.9828, 275.0203, 273.0056, 247.0235, 217.0071                                                                                                                                                        | C34H22O23 |
| Chebularic acid                             | 8.39     | 953.0895                 | 953.1012[M-H] <sup>-</sup> , 935.0895[M-H-CO <sub>2</sub> ] <sup>-</sup> , 917.0796[M-H-2CO <sub>2</sub> ] <sup>-</sup> , 909.1158, 907.0906, 801.0811[M-H-Gall] <sup>-</sup> , 783.0761, 765.0640, 757.0926                          | C41H30O27 |
| Ellagitannin m/z 603                        | 8.80     | 603.0103                 | 301.0001                                                                                                                                                                                                                              | C21H16O21 |
| Ellagitannin m/z 967                        | 9.08     | 967.1054                 | 967.0950[M-H] <sup>-</sup> , 935.0805, 917.0677, 815.0909, 783.0718, 765.0623, 749.0672, 300.9987                                                                                                                                     | C42H32O27 |
| Gallagic acid                               | 9.48     | 600.9909                 | 600.9965[M-H] <sup>-</sup> , 314.9788, 300.9998, 298.9844, 270.9888                                                                                                                                                                   | C28H10O16 |
| Phloretin                                   | 13.19    | 273.0768                 | 229.0856, 189.0553, 167.0334, 165.0222, 151.0036, 149.0288, 123.0445, 119.0499, 83.0138, 81.0343                                                                                                                                      | C15H14O5  |
| <b>Precursors (Gallic acid derivatives)</b> |          |                          |                                                                                                                                                                                                                                       |           |
| Tri-O-galloyl-glucose                       | 1.15     | 635.0893                 | 635.0893[M-H] <sup>-</sup> , 483.0790[M-H-Gall] <sup>-</sup> , 465.0685, 423.0578, 313.0562, 271.0450, 211.0242, 169.0141                                                                                                             | C27H24O18 |
| Mono-O-galloyl-glucose                      | 2.37     | 331.0669                 | 211.0283, 169.0140[M-H-Glc] <sup>-</sup> , 168.0054, 125.0244[M-H-Glc-CO <sub>2</sub> ] <sup>-</sup> , 124.0165                                                                                                                       | C13H16O10 |
| Gallic acid                                 | 2.59     | 169.0145                 | 125.0244[M-H-CO <sub>2</sub> ] <sup>-</sup> , 124.0168, 79.0196                                                                                                                                                                       | C7H6O5    |
| Di-O-galloyl quinic acid                    | 4.58     | 495.0776                 | 495.0815, 301.0007                                                                                                                                                                                                                    | C21H20O14 |
| Di-O-galloyl-glucose                        | 5.62     | 483.0781                 | 483.0790[M-H] <sup>-</sup> , 447.0968, 331.0671[M-H-Gall] <sup>-</sup> , 313.0569, 271.0470, 211.0250, 169.0150[M-H-Gall-Glc] <sup>-</sup> , 125.0247                                                                                 | C20H20O14 |
| Methyl gallate                              | 5.86     | 183.0305                 | 124.0165, 78.0118                                                                                                                                                                                                                     | C8H8O5    |
| Gallotannin m/z 803                         | 5.94     | 803.1885                 | 803.1973[M-H] <sup>-</sup> , 641.1407[M-H-Gall] <sup>-</sup> , 495.1179[M-H-Gall-Cou] <sup>-</sup> , 477.1070[M-H-Gall-Hex-2] <sup>-</sup> , 355.0695, 333.0634, 315.0525, 297.0402, 288.9999, 193.0148                               | C33H40O23 |
| Tetra-O-galloyl-glucose                     | 7.75     | 787.0996                 | 787.1025[M-H] <sup>-</sup> , 635.0923[M-H-Gall] <sup>-</sup> , 617.0817[M-H-Gall-H <sub>2</sub> O] <sup>-</sup> , 465.0696 [M-H-2Gall-H <sub>2</sub> O] <sup>-</sup> , 169.0155635 [M-H-2Gall-H <sub>2</sub> O-Gall-144] <sup>-</sup> | C34H28O22 |
| Penta-O-galloyl-glucose                     | 8.61     | 939.1110                 | 939.1184[M-H] <sup>-</sup> , 787.1045[M-H-Gall] <sup>-</sup> , 769.0952[M-H-Gall-18] <sup>-</sup> , 635.0918 [M-H-Gall-18-134]-617.0824 [M-H-2Gall-18] <sup>-</sup>                                                                   | C41H32O26 |
| Gallic acid derivative m/z 569              | 9.07     | 569.2265                 | 523.2199, 361.1665                                                                                                                                                                                                                    | C27H38O13 |
| <b>Flavonols</b>                            |          |                          |                                                                                                                                                                                                                                       |           |
| Myricetin trimethylether                    | 1.32     | 359.0761                 | 359.0980[M-H] <sup>-</sup> , 344.0715, 181.0141, 143.0348, 139.0401, 119.0379, 85.0294                                                                                                                                                | C18H16O8  |
| Syringetin                                  | 1.81     | 345.0610                 | 345.0839[M-H] <sup>-</sup> , 183.0303, 182.0236, 167.0351, 165.0177, 137.0240, 129.0194, 125.0241                                                                                                                                     | C17H14O8  |
| Amurensin                                   | 2.68     | 533.1667                 | 487.1706, 293.0867, 179.0554, 163.0038, 103.0038, 89.0245, 59.0143                                                                                                                                                                    | C26H30O12 |
| Kaempferol acetyl glucoside                 | 2.81     | 489.1043                 | 489.1085[M-H] <sup>-</sup> , 323.0916                                                                                                                                                                                                 | C23H22O12 |
| Quercetin malonyl glucoside                 | 3.94     | 549.0802                 | 451.0560, 425.0747, 365.0541, 245.0079, 237.0401, 219.0303, 191.0356                                                                                                                                                                  | C24H22O15 |
| Quercetin-3,4'-diglucoside                  | 4.13     | 625.1415                 | 625.1457[M-H] <sup>-</sup> , 463.0907[M-H-Glc] <sup>-</sup> , 462.0827, 301.0354[M-H-2Glc] <sup>-</sup> , 300.0302, 299.0302                                                                                                          | C27H30O17 |
| Myricetin 3-O-glucoside                     | 4.48     | 479.0837                 | 479.0848[M-H] <sup>-</sup> , 299.0195[M-H-Glc] <sup>-</sup> , 190.9979, 163.0028                                                                                                                                                      | C21H20O13 |
| Dihydroquercetin caffeoyl glucoside         | 4.70     | 627.1597                 | 627.1625[M-H] <sup>-</sup> , 465.1063[M-H-Glc] <sup>-</sup> , 447.0960, 339.0717, 355.0684, 285.0412, 267.0302, 193.0143                                                                                                              | C27H32O17 |
| Myricetin 3,4'-diglucoside                  | 4.72     | 641.1371                 | 641.1423[M-H] <sup>-</sup> , 479.0860[M-H-Glc] <sup>-</sup> , 317.0665[M-H-2Glc] <sup>-</sup> , 299.0201, 193.0144                                                                                                                    | C27H30O18 |
| Kaempferol dihexose                         | 4.73     | 609.1463                 | 447.0957[M-H-Hex] <sup>-</sup> , 446.0875, 285.0405([M-H-2Hex] <sup>-</sup> ), 284.0325, 283.0246                                                                                                                                     | C27H30O16 |
| Isorhamnetin sophorose                      | 4.87     | 639.1573                 | 639.1587[M-H] <sup>-</sup> , 477.1060, 476.0975, 315.0508, 314.0458, 313.0337, 300.0306                                                                                                                                               | C28H32O17 |
| Quercetin 3-O-glucoside                     | 5.35     | 463.0886                 | 463.0870[M-H] <sup>-</sup> , 300.0277[M-H-Glc] <sup>-</sup> , 301.0374, 299.9927                                                                                                                                                      | C21H20O12 |
| Kaempferol 3-O-rhamnoside                   | 5.97     | 431.0981                 | 269.0438, 268.0391, 241.0530                                                                                                                                                                                                          | C21H20O10 |
| Kaempferol-3-O-rutinoside                   | 6.03     | 593.1515                 | 355.1268, 321.0830, 193.0717, 169.0144, 161.0450, 143.0373                                                                                                                                                                            | C27H30O15 |
| Isorhamnetin 3-glucoside                    | 6.22     | 477.1045                 | 477.1059[M-H] <sup>-</sup> , 315.0525[M-H-Glc] <sup>-</sup> , 314.0440, 300.0275, 299.0190[M-H-Glc-CH <sub>3</sub> ] <sup>-</sup> , 283.0271[M-H-Glc-OH] <sup>-</sup> , 271.0268, 255.0285                                            | C22H22O12 |
| Laricitrin 3-O-glucoside                    | 6.31     | 493.0988                 | 493.1032[M-H] <sup>-</sup> , 447.0953, 285.0415, 331.0479[M-H-Glc] <sup>-</sup> , 313.0345, 284.0333, 205.0134, 189.9904                                                                                                              | C22H22O13 |
| Dihydroquercetin 3-O-hexoside               | 6.57     | 465.0620                 | 465.0610[M-H] <sup>-</sup> , 303.0069[M-H-Glc] <sup>-</sup> , 301.9969[M-H-Glc] <sup>-</sup> , 300.9991, 299.9957                                                                                                                     | C27H14O8  |
| Dihydrokaempferol 7-O-glucoside             | 6.59     | 449.1092                 | 449.1130[M-H] <sup>-</sup> , 287.0619, 269.0514, 178.9992, 151.0047, 125.0259                                                                                                                                                         | C21H22O11 |
| Myricetin 3-O-glucuronide                   | 6.61     | 493.0639                 | 493.1186[M-H] <sup>-</sup> , 447.0994, 437.0765, 331.0467, 298.0121, 285.0407, 125.0204                                                                                                                                               | C21H18O14 |
| Syringetin 3-glucoside                      | 6.84     | 507.1157                 | 507.1194[M-H] <sup>-</sup> , 461.1116, 345.0629[M-H-Glc] <sup>-</sup> , 331.0447, 299.0566, 297.0069, 190.9977                                                                                                                        | C23H24O13 |
| Quercetin 3-glucuronide                     | 7.01     | 477.0696                 | 477.0679[M-H] <sup>-</sup> , 315.0177, 299.9913, 271.0240, 269.0449                                                                                                                                                                   | C21H18O13 |
| Rutin                                       | 8.09     | 609.1473                 | 609.1510[M-H] <sup>-</sup> , 301.0368[M-H-Rha-Glc] <sup>-</sup> , 300.0290                                                                                                                                                            | C27H30O16 |
| Dihydrokaempferol 3-O-arabinoside           | 8.15     | 419.0986                 | 419.0995[M-H] <sup>-</sup> , 257.0455, 256.0383                                                                                                                                                                                       | C20H20O10 |
| Laricitrin                                  | 9.16     | 331.0470                 | 300.0302, 271.0266, 255.0303, 243.0306, 215.0347, 178.9978, 151.0028, 107.0140                                                                                                                                                        | C16H12O8  |
| Isorhamnetin 3-glucuronide                  | 9.39     | 491.0851                 | 491.0908[M-H] <sup>-</sup> , 313.0005, 285.0112                                                                                                                                                                                       | C22H20O13 |
| Kaempferol 3-O-glucuronide                  | 9.65     | 461.0726                 | 461.0600[M-H] <sup>-</sup> , 315.0143, 299.9916, 255.0280, 227.0340, 221.0469                                                                                                                                                         | C21H18O12 |
| Kaempferol 3-O-glucoside                    | 9.66     | 447.0945                 | 447.0942[M-H] <sup>-</sup> , 285.0409[M-H-Glc] <sup>-</sup> , 284.0334, 257.0452, 151.0041                                                                                                                                            | C21H20O11 |

Supplementary Table 4 Cont.

| Compounds                                 | RT (min) | [M-H] <sup>-</sup> (m/z) | UPLC-Triple TOF-MS/MS (m/z) <sup>2</sup>                                                                                                                                                                            | Formula   |
|-------------------------------------------|----------|--------------------------|---------------------------------------------------------------------------------------------------------------------------------------------------------------------------------------------------------------------|-----------|
| Myricetin                                 | 10.15    | 317.0306                 | 317.0308[M-H] <sup>-</sup> , 271.0257, 178.9980, 151.0036, 137.0242, 109.0293, 107.0134                                                                                                                             | C15H10O8  |
| Dihydroquercetin                          | 10.75    | 303.0512                 | 153.0180, 151.0395, 123.0453, 105.0350                                                                                                                                                                              | C15H12O7  |
| Quercetin                                 | 12.10    | 301.0356                 | 301.0361[M-H] <sup>-</sup> , 178.9983, 151.0034, 121.0286, 107.0137                                                                                                                                                 | C15H10O7  |
| Kaempferol                                | 13.81    | 285.0405                 | 285.0401[M-H] <sup>-</sup> , 229.0502, 211.0391, 187.0393, 185.0602                                                                                                                                                 | C15H10O6  |
| Isorhamnetin                              | 13.96    | 315.0512                 | 315.0528[M-H] <sup>-</sup> , 300.0276, 283.0287, 271.0253, 255.0292, 151.0024, 107.0148                                                                                                                             | C16H12O7  |
| <b>Benzoic acids</b>                      |          |                          |                                                                                                                                                                                                                     |           |
| Malic acid                                | 1.37     | 133.0138                 | 78.9625, 71.0143                                                                                                                                                                                                    | C4H6O5    |
| Citric acid                               | 1.67     | 191.0199                 | 111.0086, 87.0090, 85.0304, 59.0134, 57.0355                                                                                                                                                                        | C6H8O7    |
| Mucic acid methyl ester gallate           | 2.32     | 375.0570                 | 205.0380, 169.0170, 111.0097, 87.0088                                                                                                                                                                               | C14H16O12 |
| Mucic acid methyl ester digallate         | 2.34     | 527.0675                 | 451.0552, 423.0627, 391.0349, 303.0155, 288.9978, 275.0191, 249.0421, 245.0083                                                                                                                                      | C21H20O16 |
| Mucic acid digallate                      | 3.19     | 513.0520                 | 433.0460, 363.0352, 261.0010, 245.0101, 209.0079[M-H-2Gall] <sup>-</sup> , 191.0355[M-H-2Gall-H <sub>2</sub> O] <sup>-</sup> , 169.0151                                                                             | C20H18O16 |
| Vanillic acid                             | 3.23     | 167.0352                 | 137.0201, 136.0173, 122.0384, 109.0305, 95.0514, 91.0175                                                                                                                                                            | C8H8O4    |
| Mucic acid lactone digallate              | 3.24     | 495.0415                 | 423.0589, 379.0708, 363.0349, 261.0052, 245.0455, 243.0322, 235.0260, 191.0353                                                                                                                                      | C20H16O15 |
| Vanillic acid 4-glucoside                 | 3.25     | 329.0878                 | 329.0882[M-H] <sup>-</sup> , 167.0349, 166.0272, 151.0402, 109.0293                                                                                                                                                 | C14H18O9  |
| 1-O-protocatechuoyl-glucose               | 3.92     | 315.0737                 | 207.0001, 168.9397, 153.0192[M-H-Hex] <sup>-</sup> , 152.0074, 109.0295, 108.0230                                                                                                                                   | C13H16O9  |
| Brevifolin carboxylic acid                | 6.73     | 291.0150                 | 247.0257, 219.0301, 191.0350, 173.0238, 1450.292                                                                                                                                                                    | C13H8O8   |
| Dihydroxybenzoic acid (Genestic acid)     | 7.19     | 153.0193                 | 109.0288, 108.0211, 91.0180, 81.0340, 65.0049                                                                                                                                                                       | C7H6O4    |
| Syringic acid                             | 7.96     | 197.0458                 | 182.0227, 169.0158, 166.9973, 162.8394, 160.8408, 125.0236, 124.0159, 123.0080                                                                                                                                      | C9H10O5   |
| Dihydroxybenzate ethyl ester              | 10.54    | 181.0509                 | 166.0278, 149.0243                                                                                                                                                                                                  | C9H10O4   |
| Mono hydroxybenzoic acid (Salicylic acid) | 11.37    | 137.0244                 | 136.8610, 93.0327, 75.0248, 65.0428                                                                                                                                                                                 | C7H6O3    |
| <b>Flavan-3-ols</b>                       |          |                          |                                                                                                                                                                                                                     |           |
| (Epi)gallocatechin                        | 3.72     | 305.0664                 | 153.0187[M-H-Gall] <sup>-</sup> , 151.0040, 125.0246, 121.0284, 107.0139                                                                                                                                            | C15H14O7  |
| (Epi)catechin hexoside                    | 5.05     | 451.1243                 | 361.0920, 331.0827, 313.0718, 289.0719[M-H-Hex] <sup>-</sup> , 287.0932, 269.0809, 245.0818, 205.0512, 203.0709                                                                                                     | C21H24O11 |
| (Epi)gallocatechin gallate                | 5.73     | 457.0781                 | 331.0846, 303.0505[M-2H-Gall] <sup>-</sup> , 169.0133, 153.0190, 150.9999, 151.0399 [M-H-Epigallocatechin] <sup>-</sup> , 125.0230, 123.0091                                                                        | C22H18O11 |
| Procyanidin B                             | 5.93     | 577.1349                 | 425.0894 [M-H-Gall] <sup>-</sup> , 407.0787, 289.0724[M-H-Epicat] <sup>-</sup> , 273.0412, 245.0817, 125.0251                                                                                                       | C30H26O12 |
| (Epi)catechin                             | 6.59     | 289.0716                 | 245.0825[M-H-CO <sub>2</sub> ] <sup>-</sup> , 203.0714, 151.0401, 137.0249, 125.0245, 123.0461, 109.0306                                                                                                            | C15H14O6  |
| Procyanidin trimer                        | 6.77     | 865.1992                 | 865.2036[M-H] <sup>-</sup> , 713.1533[M-H-Gall] <sup>-</sup> , 695.1404[M-H-Gall-18] <sup>-</sup> , 577.1379[M-H-Epicat] <sup>-</sup> , 575.1216, 425.0871, 407.0773, 289.0718[M-H-2Epicat] <sup>-</sup> , 285.0557 | C45H38O18 |
| Propelargonidin dimer                     | 7.43     | 561.1404                 | 561.1429[M-H] <sup>-</sup> , 435.1087, 423.1092, 405.0977, 273.0398, 271.0607, 229.0511, 173.0601, 137.0234, 125.0240                                                                                               | C30H26O11 |
| Propelargonidin trimer                    | 7.53     | 849.2035                 | 849.2079[M-H] <sup>-</sup> , 679.1609, 653.1706, 561.1417, 545.1124, 431.0787, 407.0778, 271.0592                                                                                                                   | C45H38O17 |
| (Epi)catechin gallate                     | 8.29     | 441.0825                 | 289.0722[M-H-Gall] <sup>-</sup> , 245.0819[M-H-Gall-CO <sub>2</sub> ] <sup>-</sup> , 203.0715, 169.0148, 125.0248                                                                                                   | C22H18O10 |
| Methylepigallocatechin-3-gallate          | 8.65     | 471.0933                 | 287.0570, 269.0463, 169.0147, 165.0190, 161.0246, 151.0398, 125.0253                                                                                                                                                | C23H20O11 |
| Procyanidin A                             | 9.61     | 575.1189                 | 407.0769, 289.0731, 287.0525[M-H-Epicat] <sup>-</sup> , 285.0424, 169.0155, 165.0222, 137.0243, 125.0239                                                                                                            | C30H24O12 |
| <b>Stilbens</b>                           |          |                          |                                                                                                                                                                                                                     |           |
| Resveratrol                               | 10.90    | 227.0716                 | 227.0706, 185.0599, 183.0793, 182.0728, 181.0654, 143.0499, 117.0343, 115.0549                                                                                                                                      | C14H12O3  |
| Resveratrol-3-O-glucoside                 | 12.33    | 389.1247                 | 329.0998, 269.0788, 240.0754, 223.0812, 212.0825, 180.0551, 147.0560                                                                                                                                                | C20H22O8  |
| <b>Cinnamic acids</b>                     |          |                          |                                                                                                                                                                                                                     |           |
| Di-coumaroyl hexose                       | 2.25     | 471.1307                 | 355.1247, 247.0226, 193.0675, 163.0250, 145.0144, 112.9886, 103.0041                                                                                                                                                | C24H24O10 |
| Ferulic acid                              | 10.60    | 193.0511                 | 193.0547, 161.0246, 134.0379, 133.0288, 59.0157                                                                                                                                                                     | C10H10O4  |

<sup>1</sup> Peak View 2.0 and Marker View 1.2.1 software (AB SCIEX, USA) are used for qualitative analysis. The polyphenol database of both offline self-built and online Chemspider (<http://www.chemspider.com>), Mass Bank (<http://www.massbank.jp>) and Phenol-explorer (<http://phenol-explorer.eu>) are used for searching and comparing, together with the RT and MS/MS ions information described in references.

<sup>2</sup> The MS/MS response ions are shown with signal strength  $\geq 10\%$ . Only the top ten ions are exhibited if the ion number  $\geq 10$ . The square brackets represent fragmentation pattern of the deprotonated ions. Glc: glucose; Cou: coumaroyl; Gall: galloyl; Hex: hexose; HHDP: hexahydroxydiphenic acid; Rha: rhamnoside; Epicat: epicatechin.
