# Supplementary material for: Profile of Polyphenol Compounds of Five Muscadine Grapes Cultivated in the United States and in Newly Adapted Locations in China
Source: Int J Mol Sci. 2017 Mar 14;18(3):631. doi: 10.3390/ijms18030631 (PMC5372644; doi:10.3390/ijms18030631)
Supplement: Supplementary file 1 [file ijms-18-00631-s001.zip]

Archive with 5 entries (5 files):
- Table S4.pdf
- ijms-178535-suppl-figures.pdf
- Table S1.pdf
- Table S2.pdf
- Table S3.pdf
